# Supplementary material for: An Overview of Two Old Friends Associated with Platelet Redox Signaling, the Protein Disulfide Isomerase and NADPH Oxidase
Source: Biomolecules. 2023 May 17;13(5):848. doi: 10.3390/biom13050848 (PMC10216113; doi:10.3390/biom13050848)
Supplement: Supplementary file 1 [file biomolecules-13-00848-s001.zip]

Archive with 11 entries (11 files):
- biomolecules-2122105-supplementary.pdf
- Supplementary Figure S1.pdf
- Supplementary Figure S10.pdf
- Supplementary Figure S2.pdf
- Supplementary Figure S3.pdf
- Supplementary Figure S4.pdf
- Supplementary Figure S5.pdf
- Supplementary Figure S6.pdf
- Supplementary Figure S7.pdf
- Supplementary Figure S8.pdf
- Supplementary Figure S9.pdf
