# Supplementary figures and images for: An Overview of Two Old Friends Associated with Platelet Redox Signaling, the Protein Disulfide Isomerase and NADPH Oxidase
Source: MDPI journal article supplement (doi:10.3390/biom13050848), 2023-05-17

A

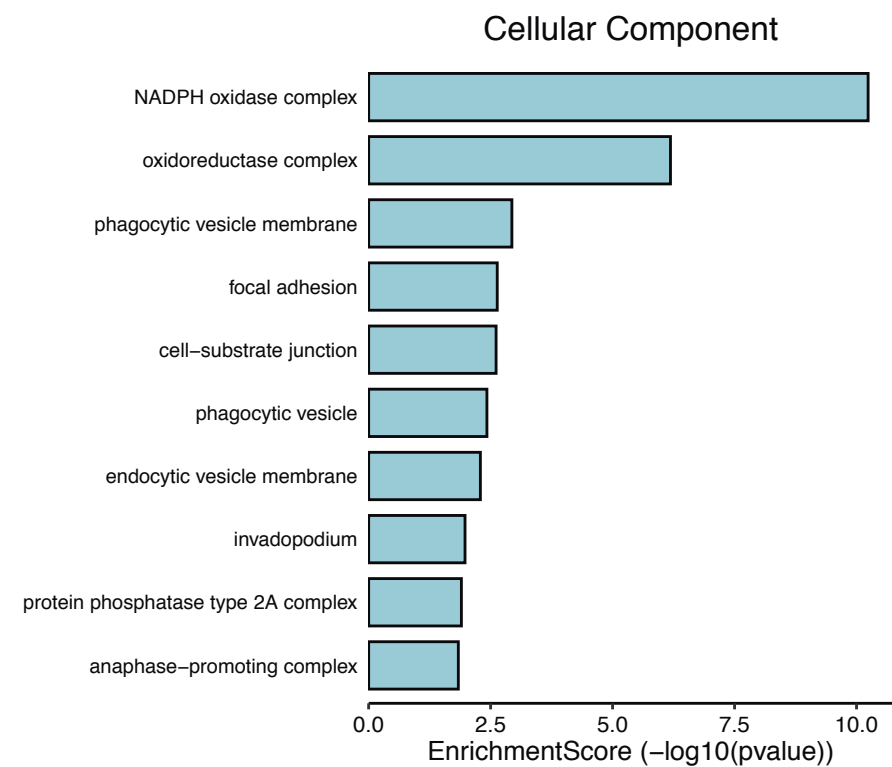

B

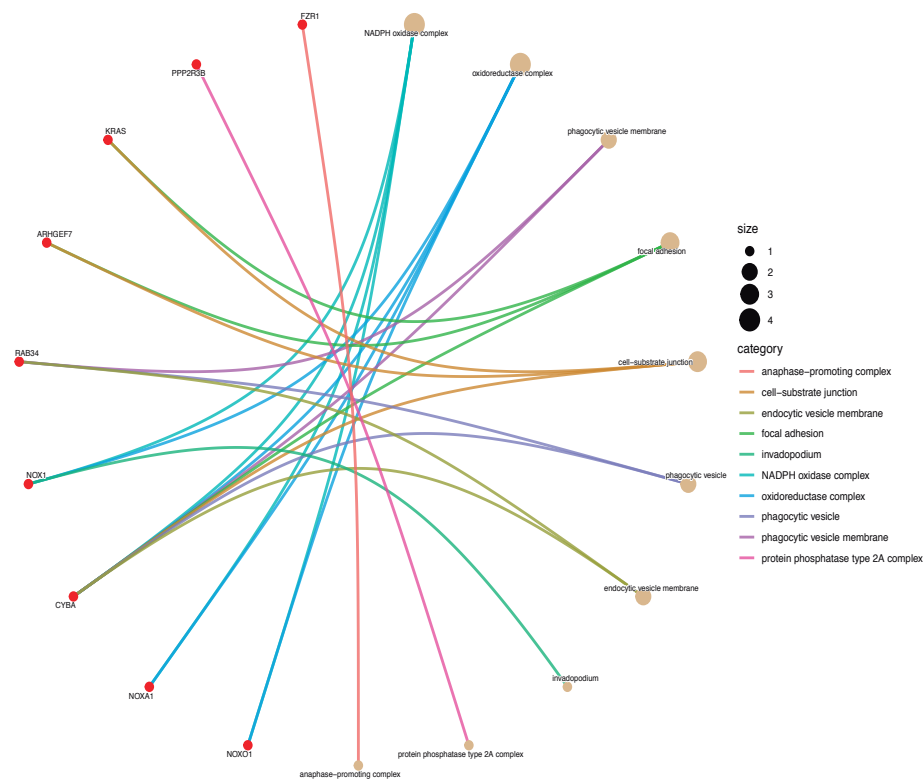

C

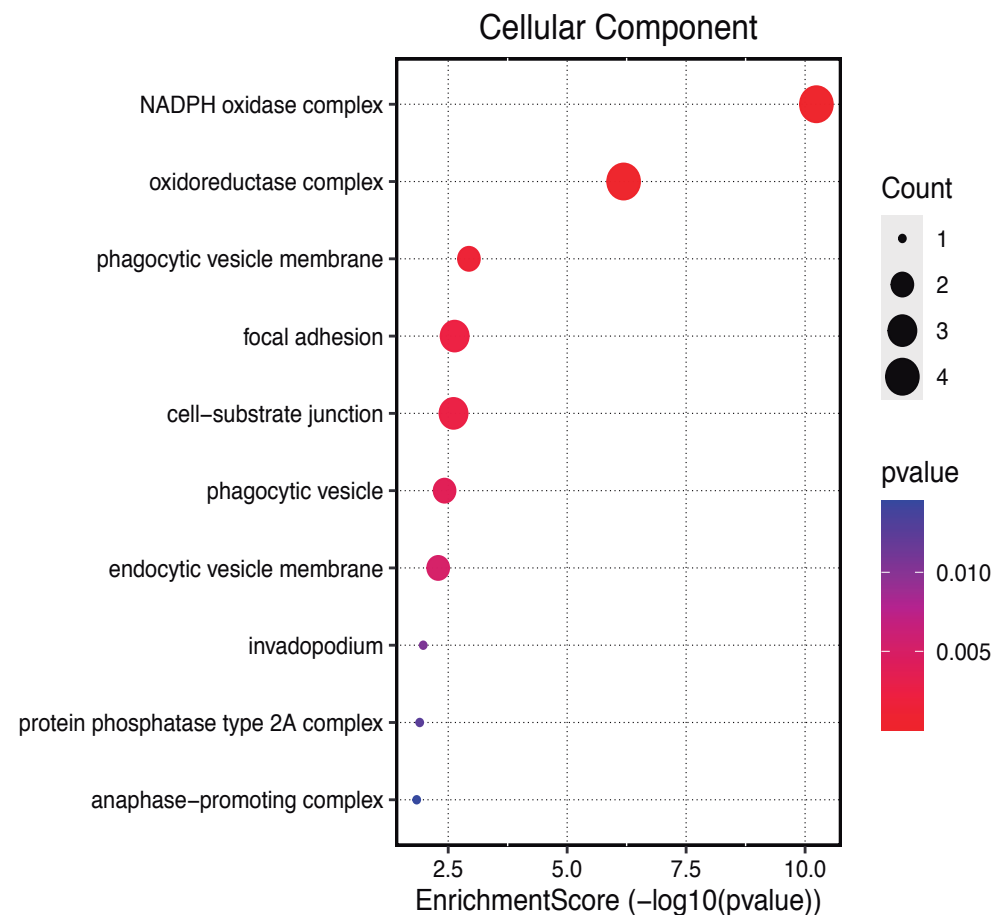

D

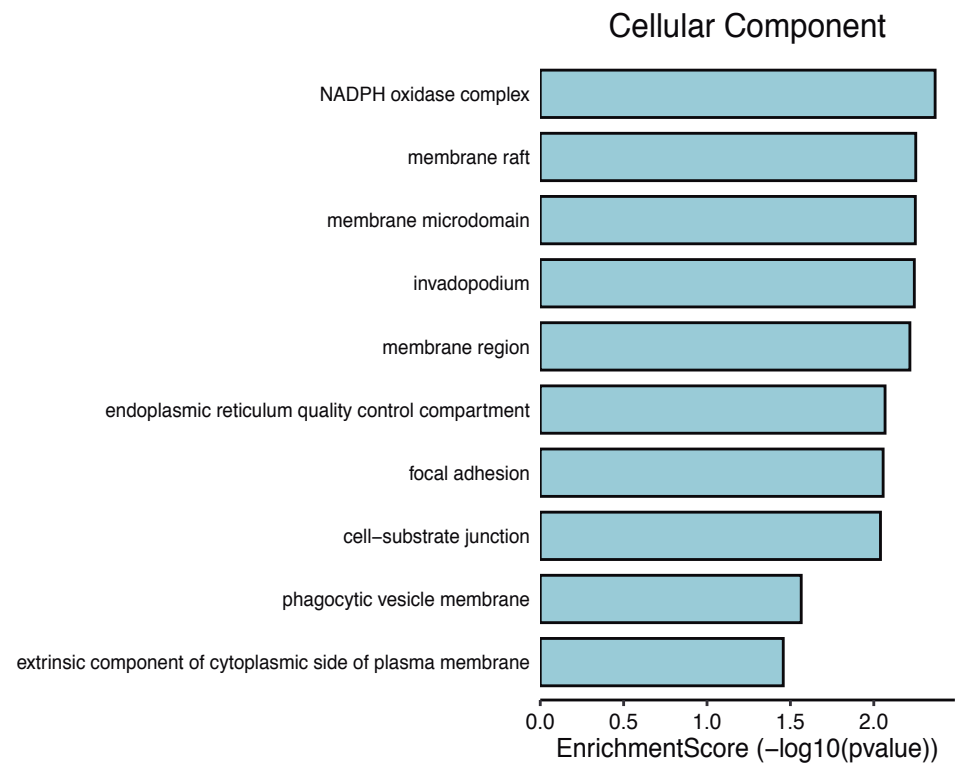

E

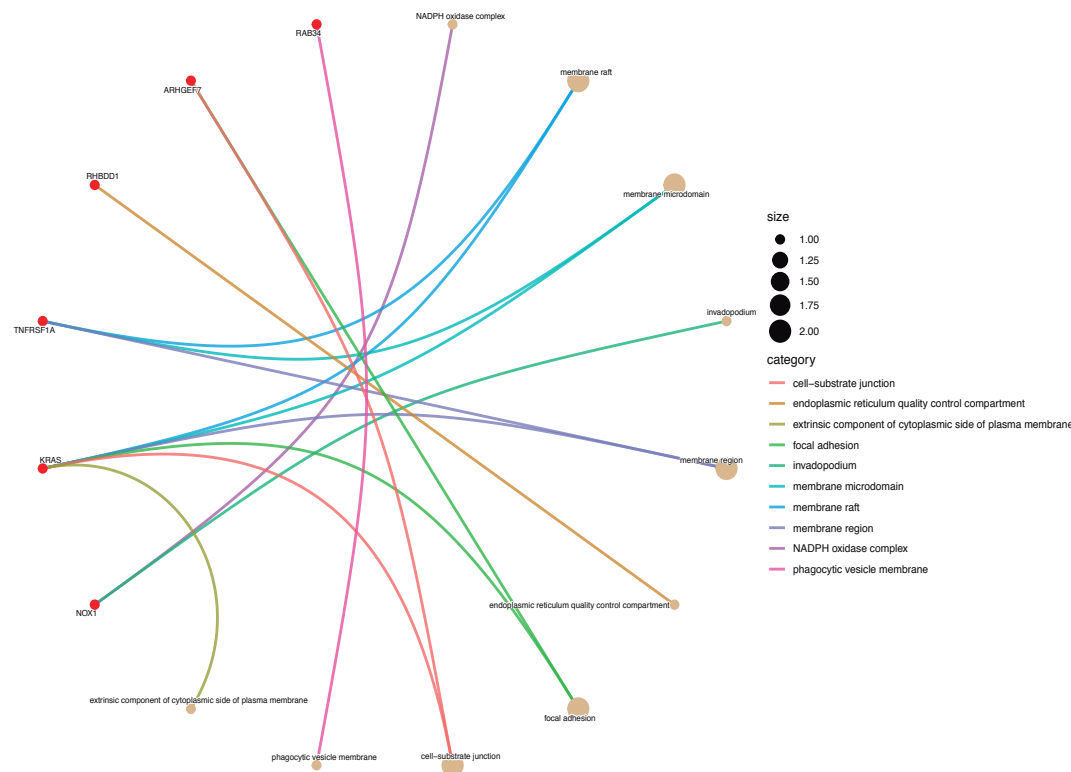

F

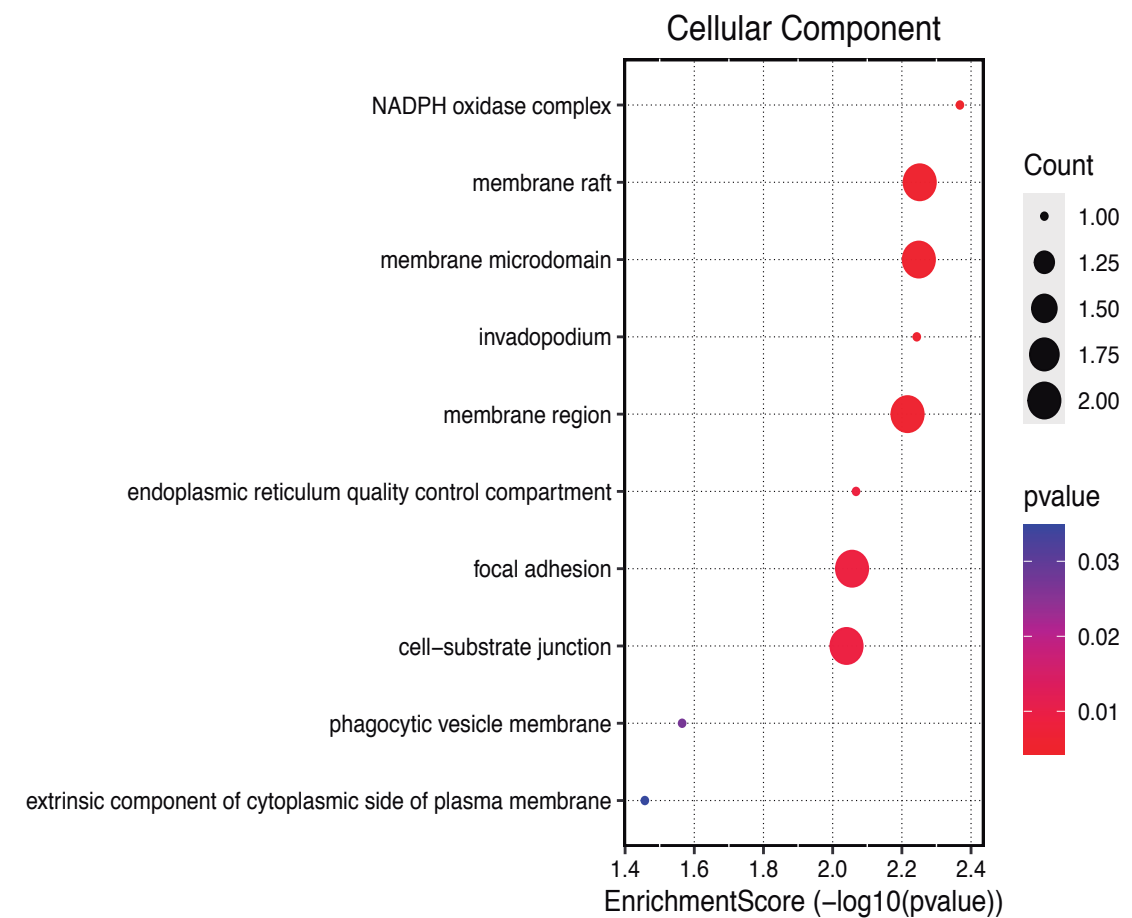

Supplement: s1 [file s1]

A

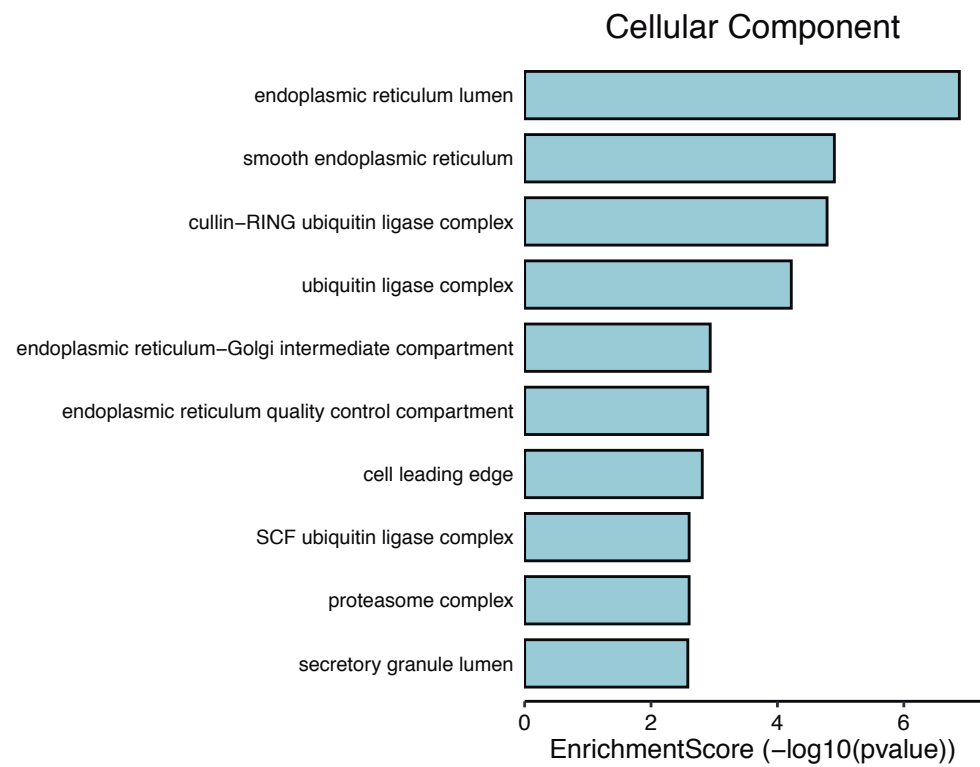

B

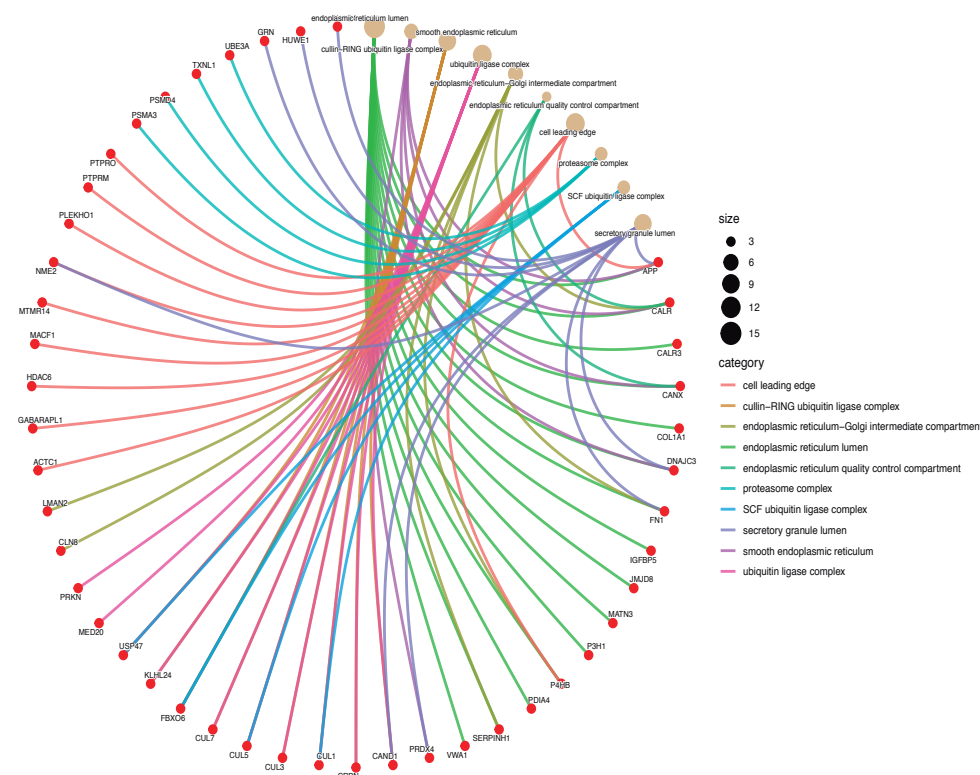

C

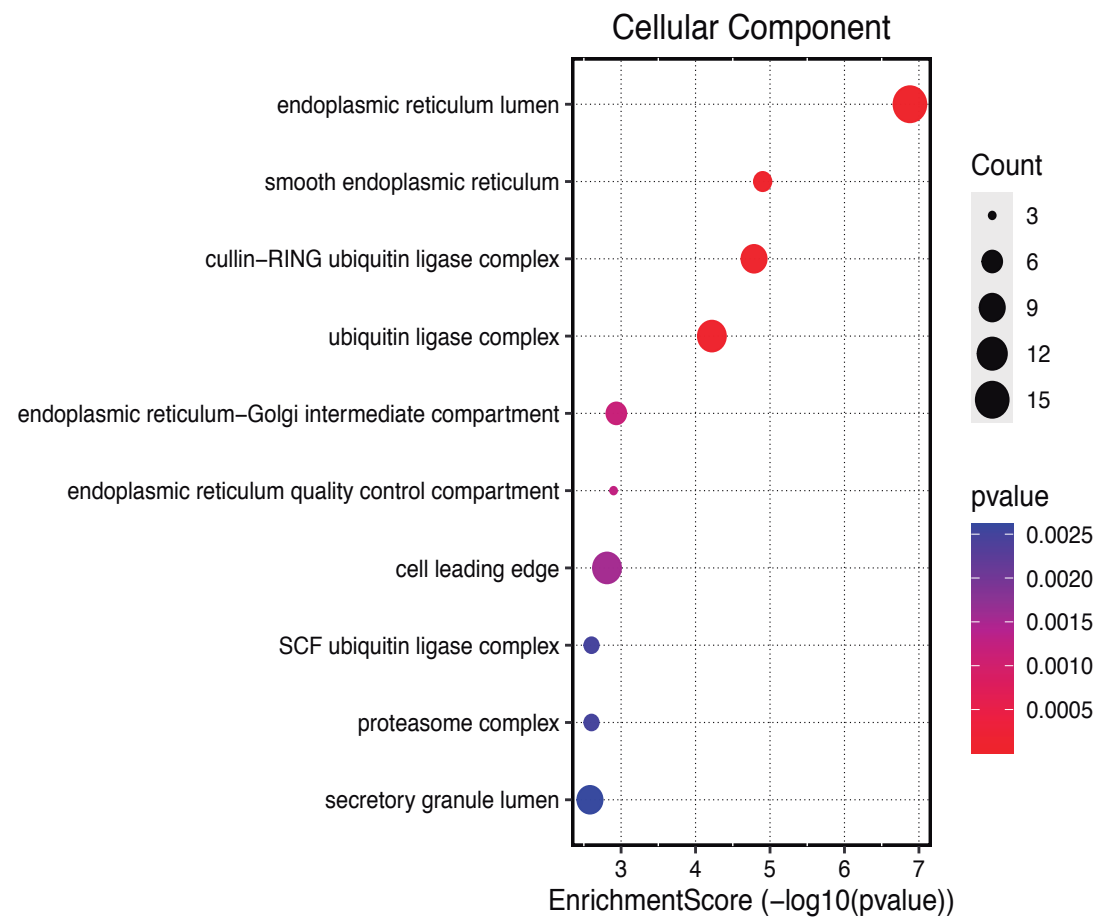

D

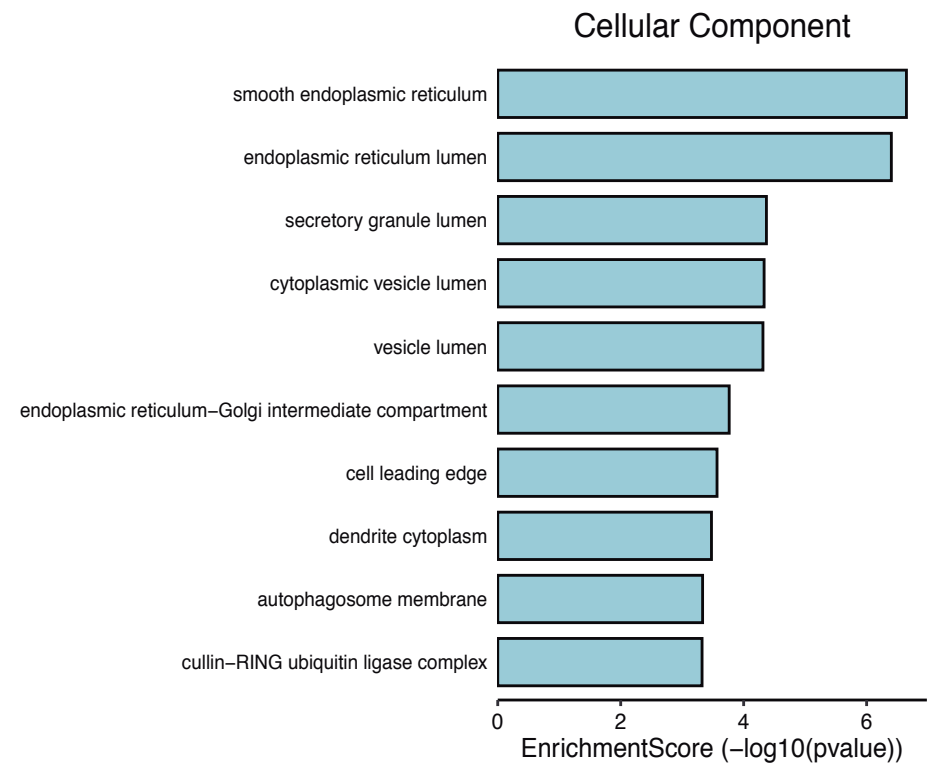

E

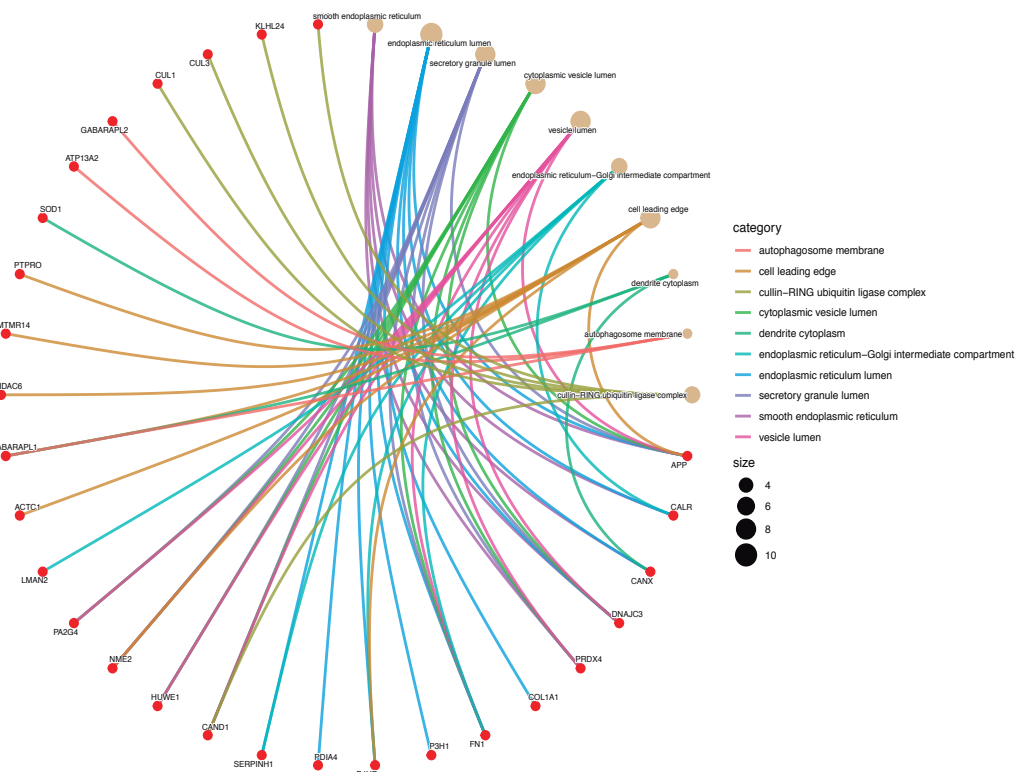

F

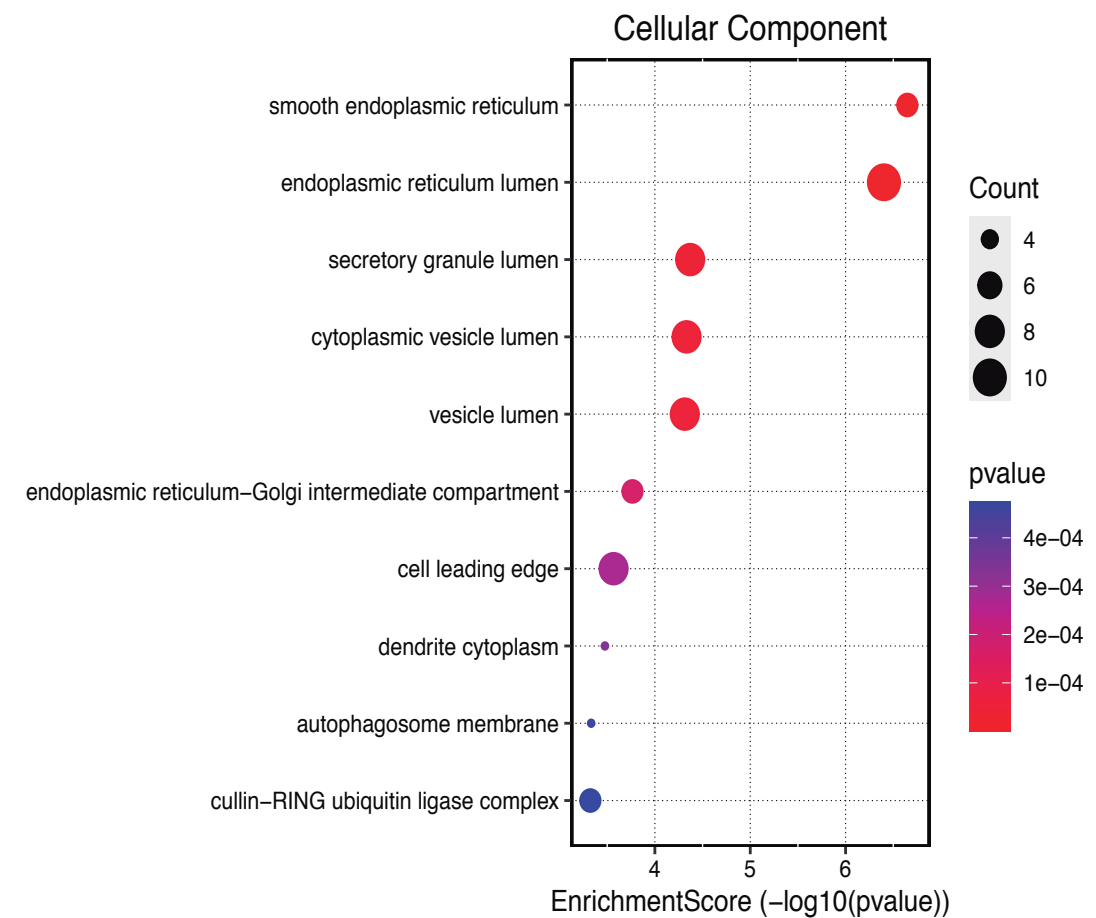

Supplement: s1 [file s1]

PDIA6

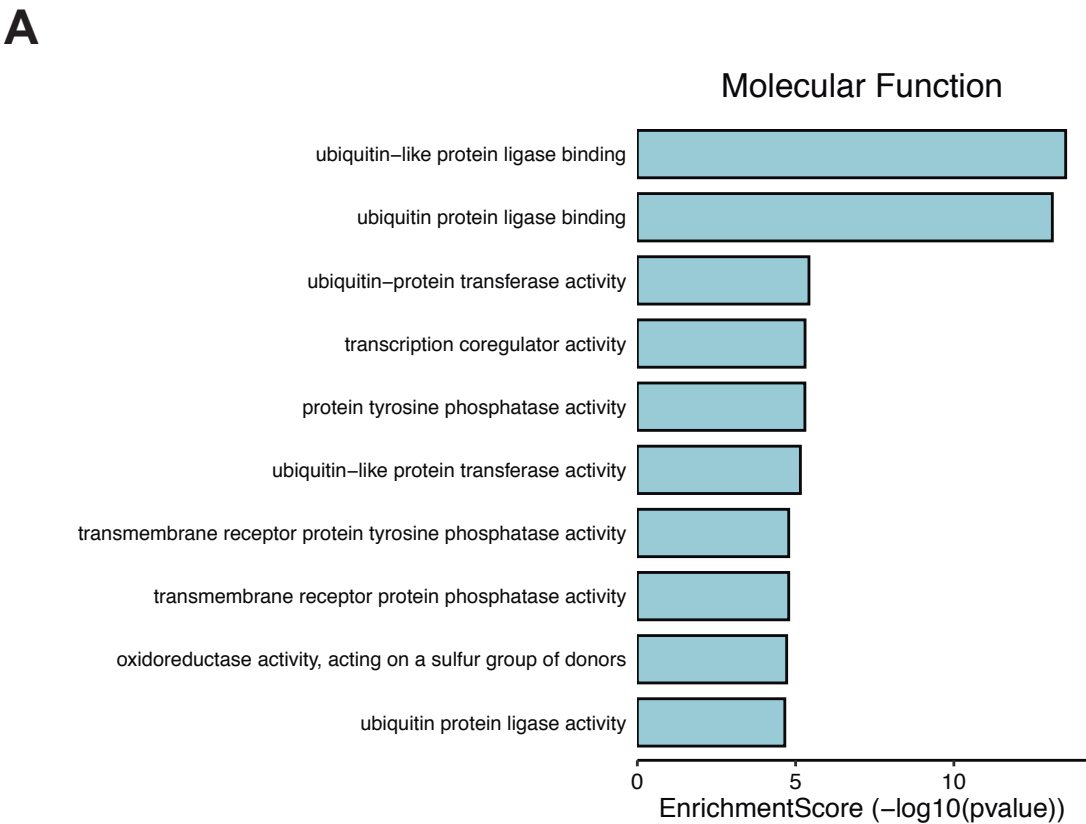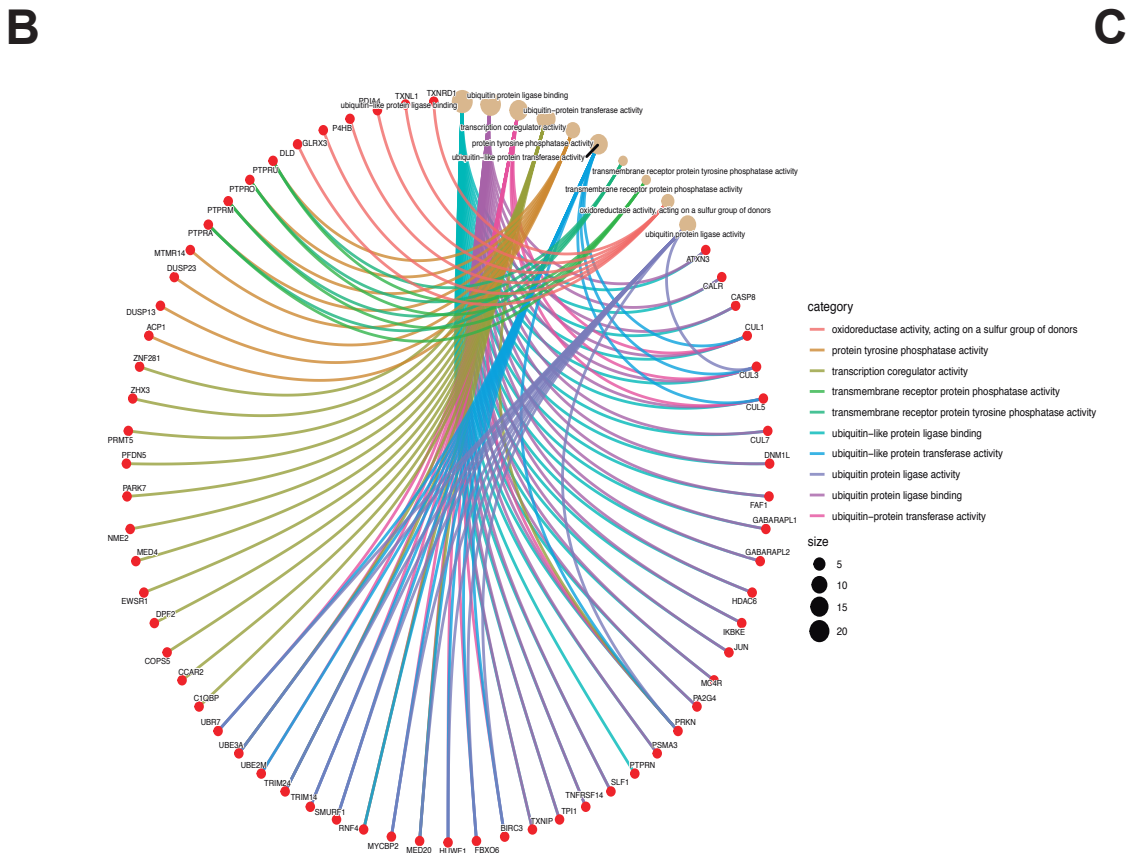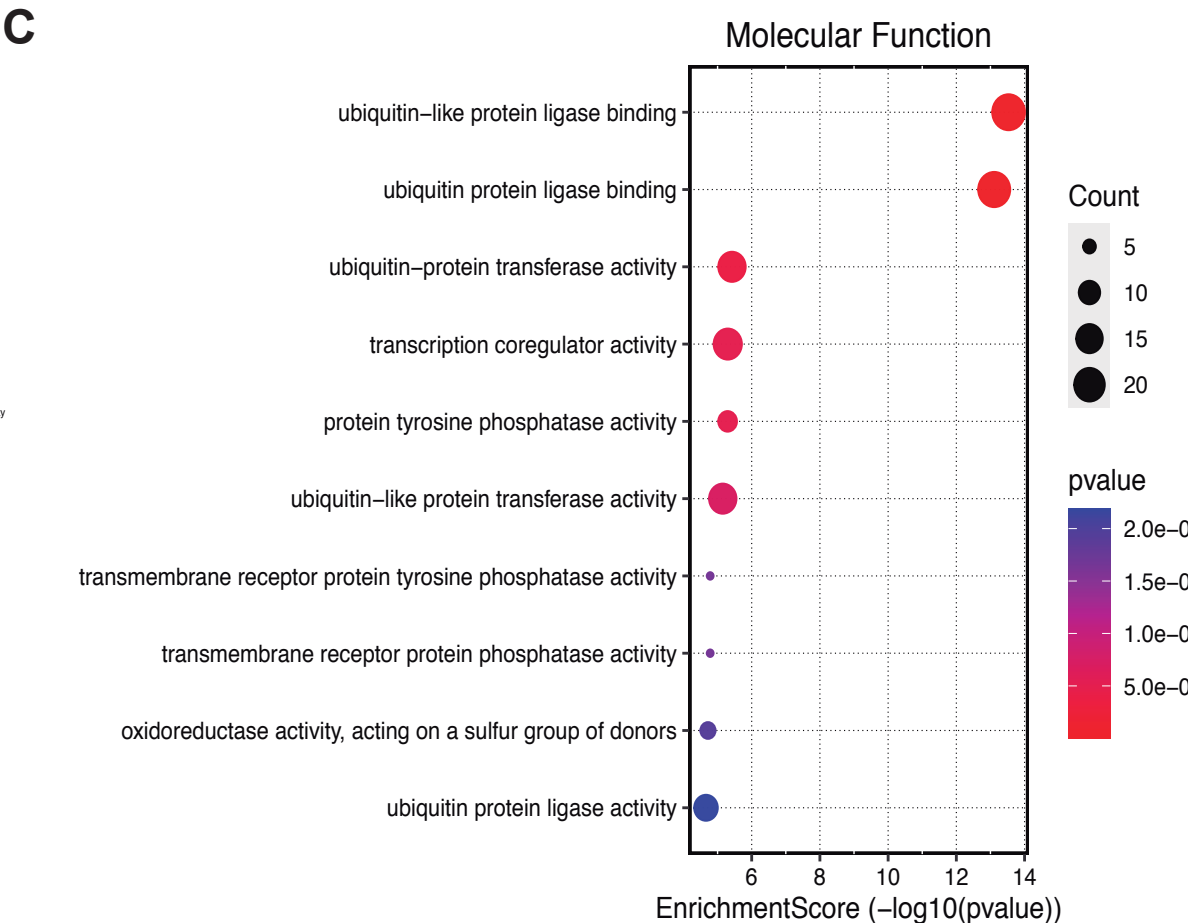

PDIA6-Platelets

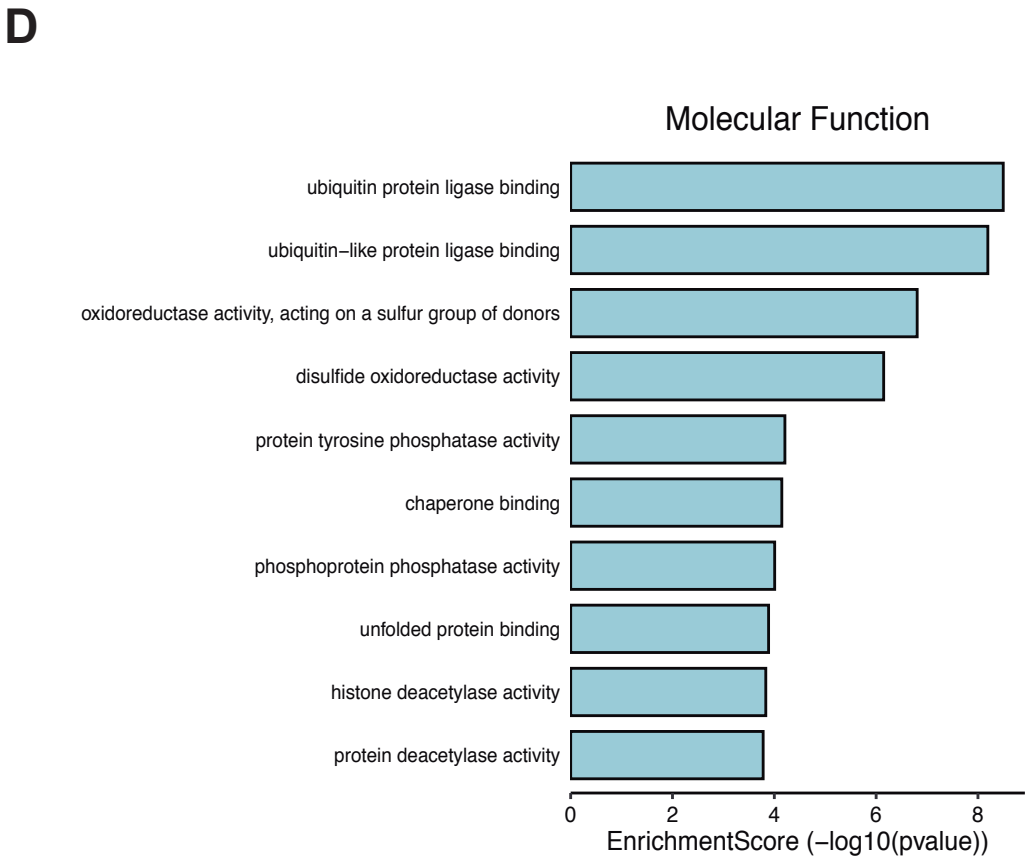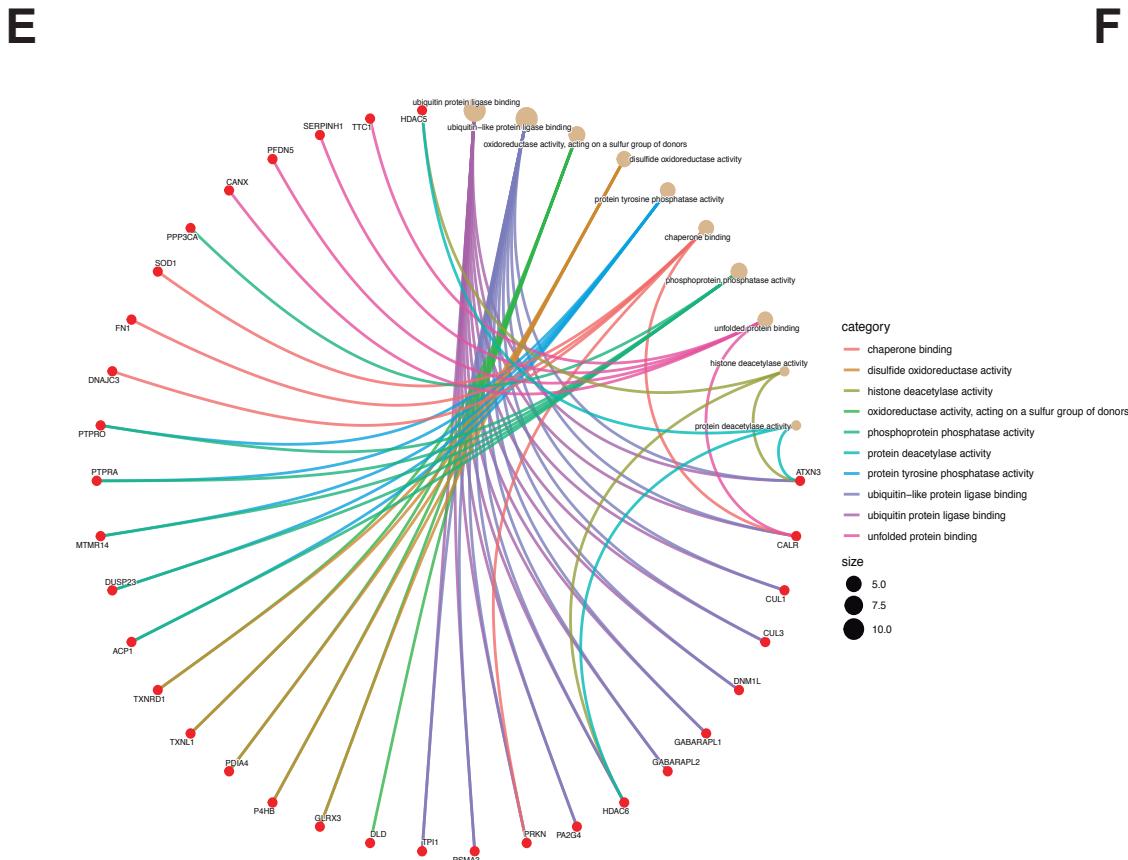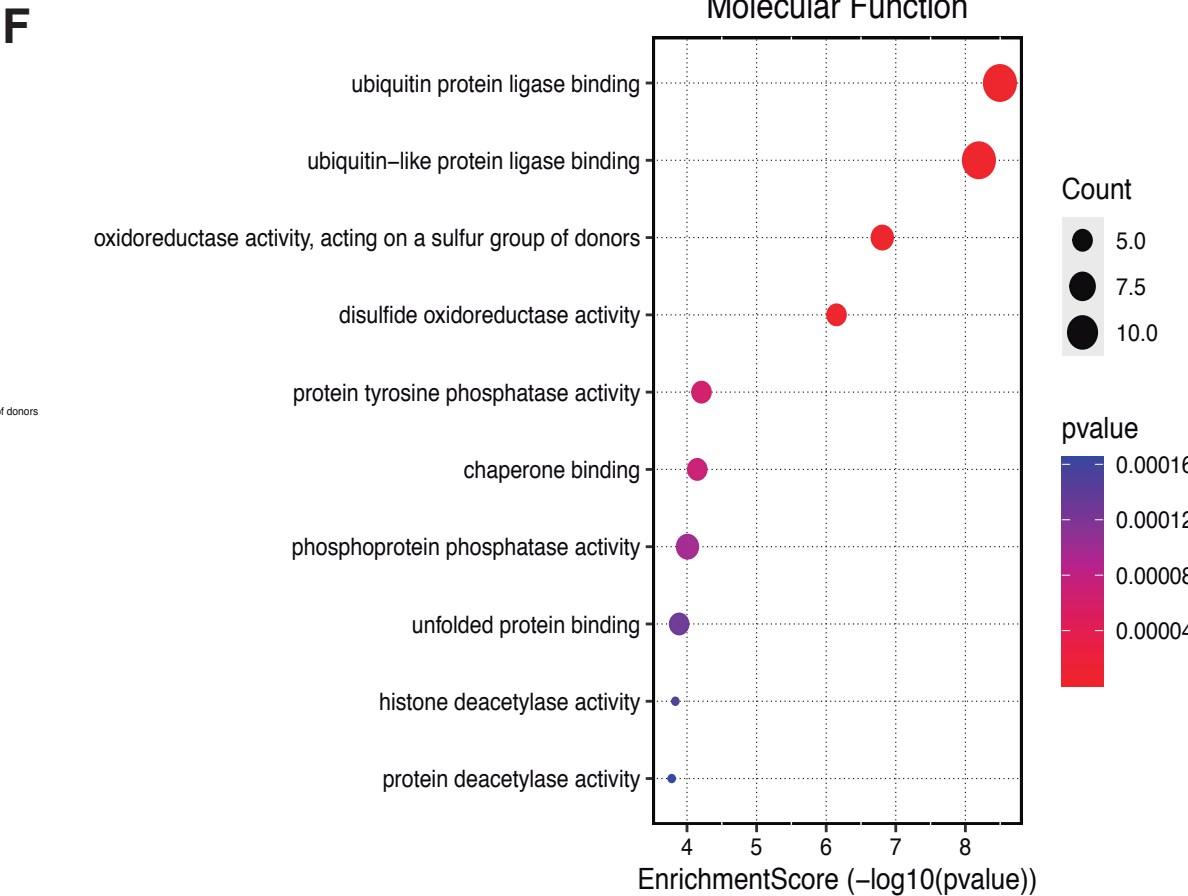

Supplement: s1 [file s1]

PDIA3

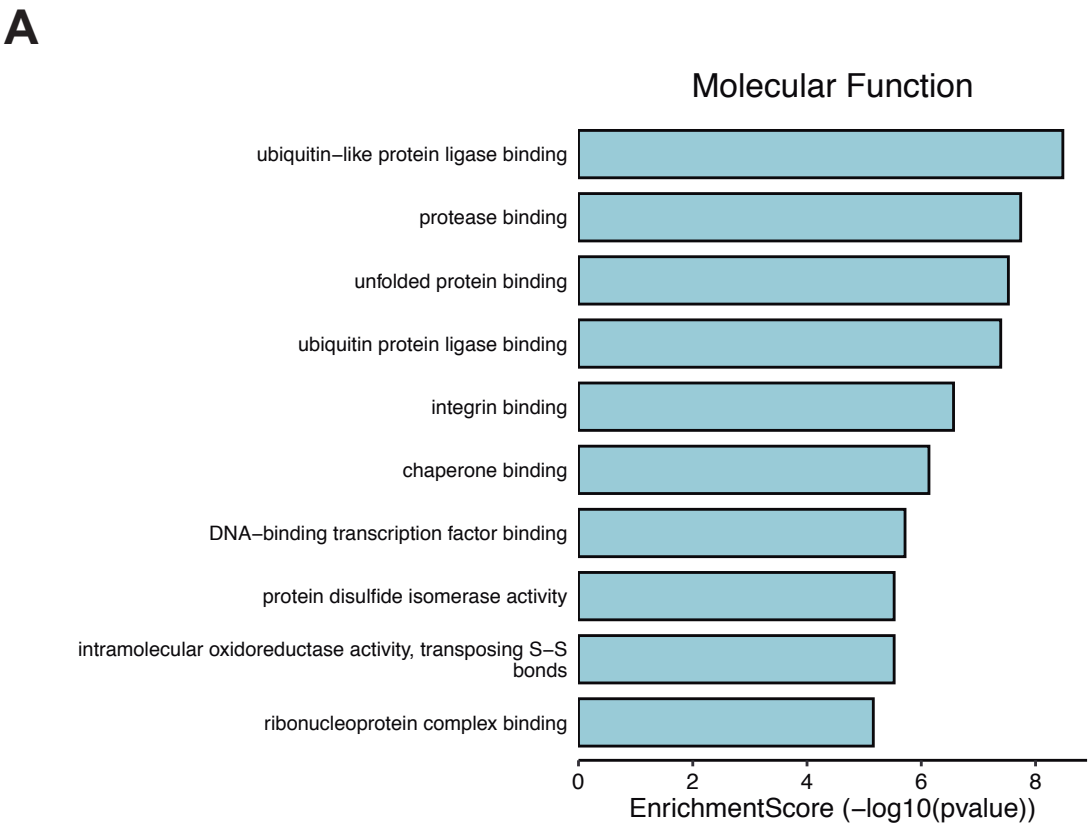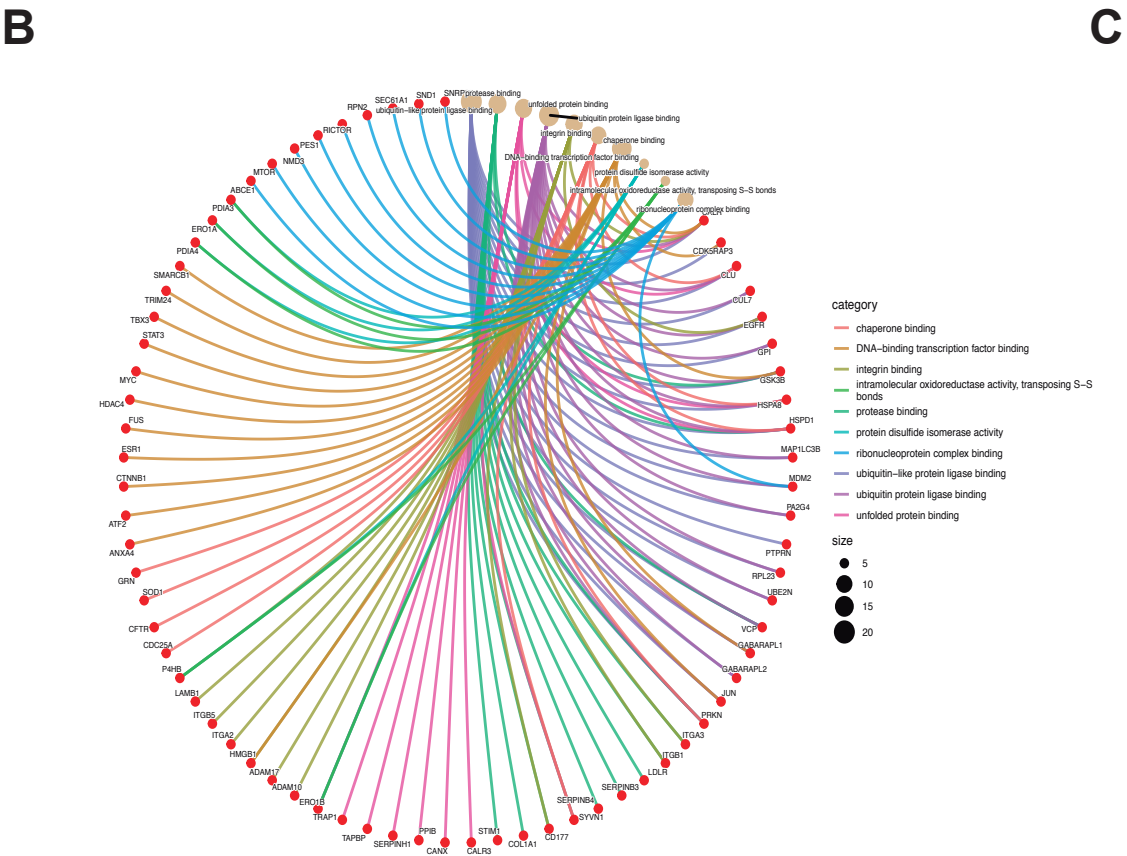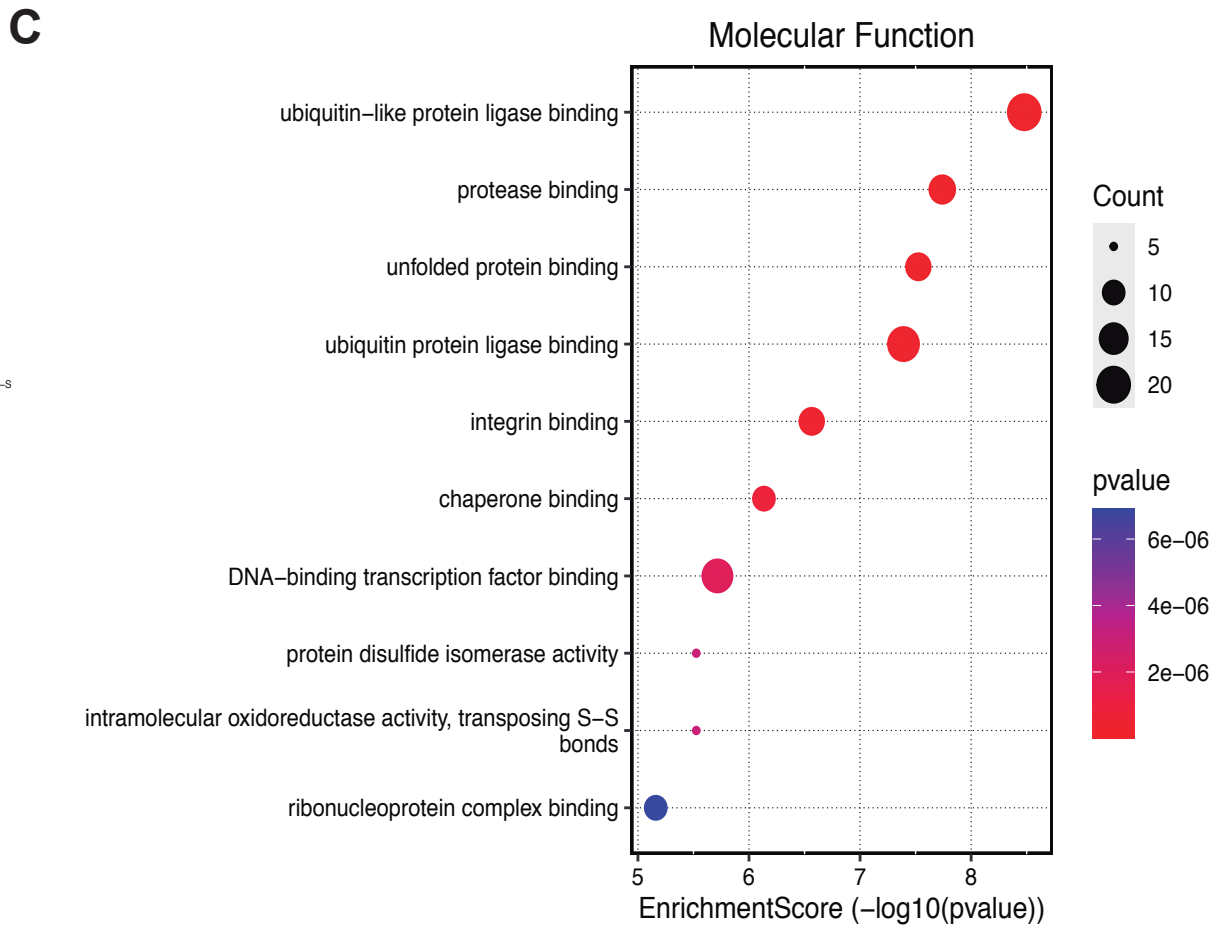

PDIA3-Platelets

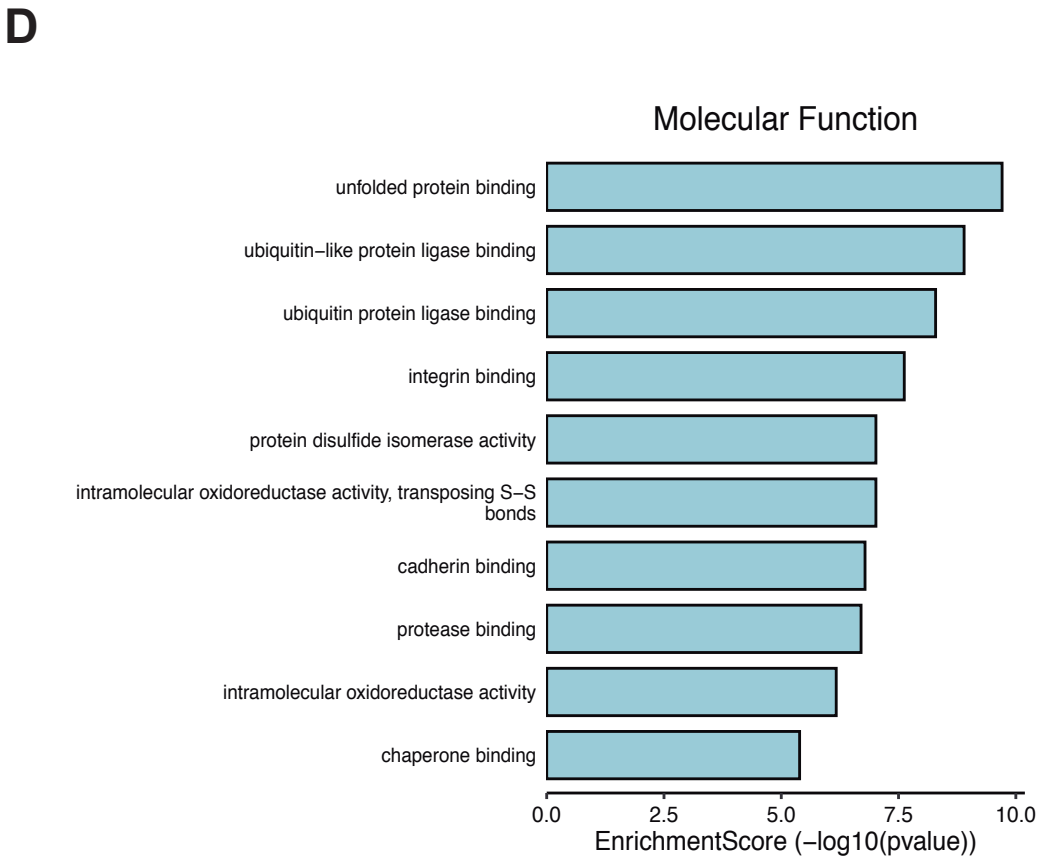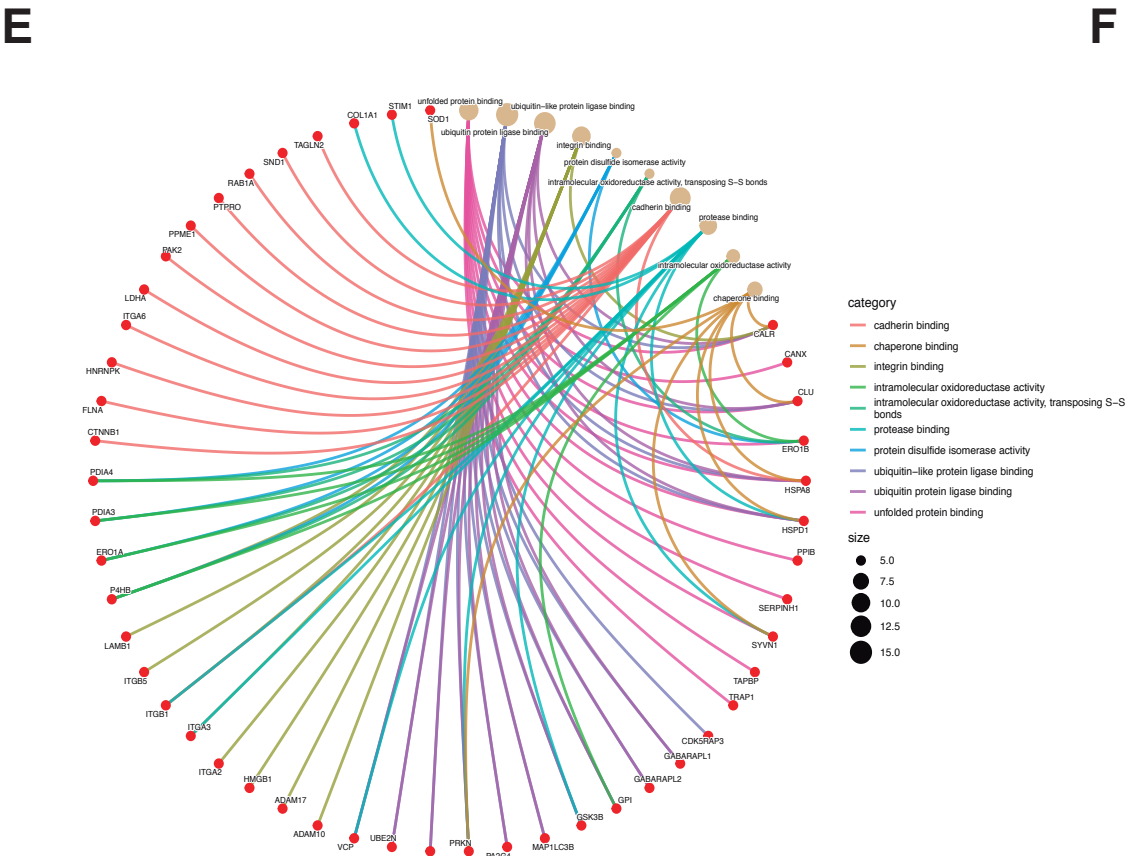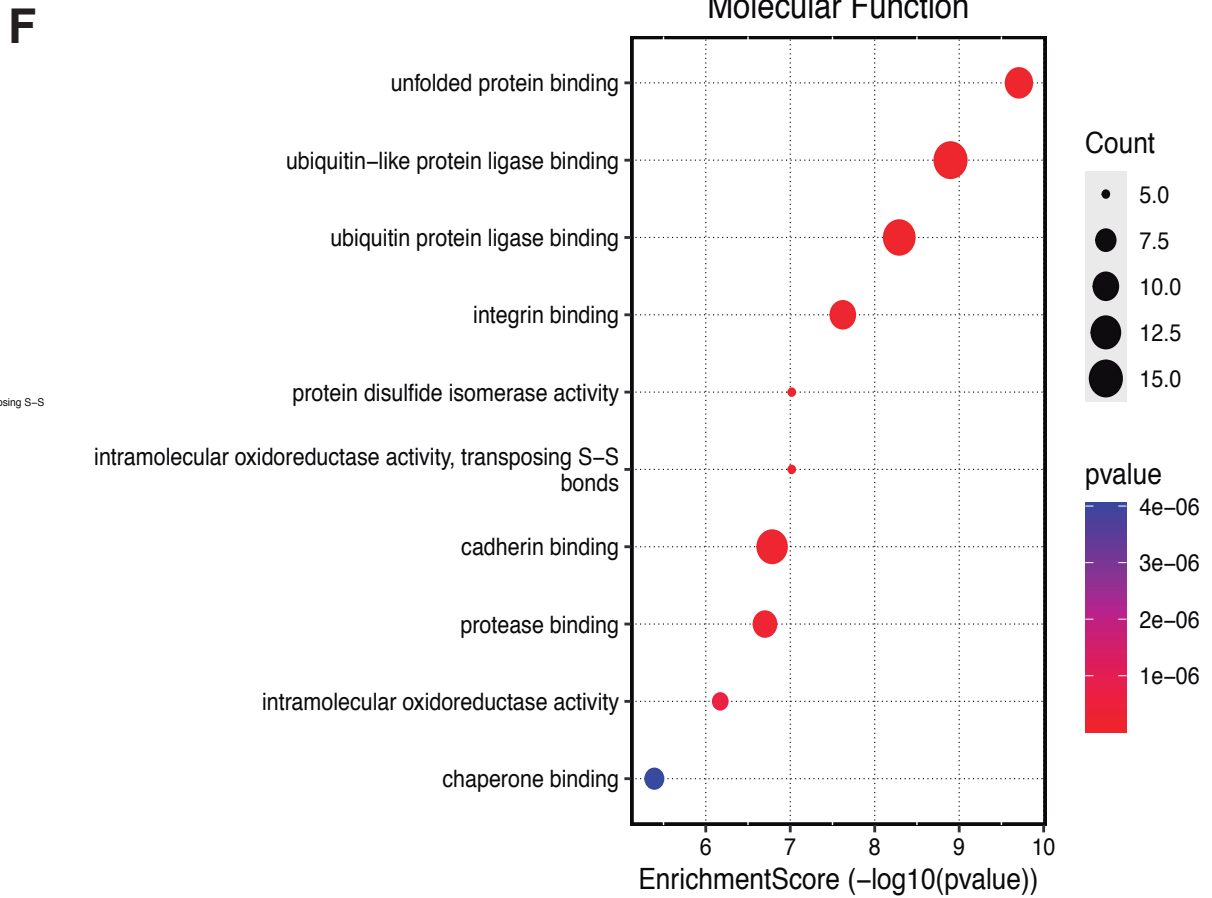

Supplement: s1 [file s1]

A

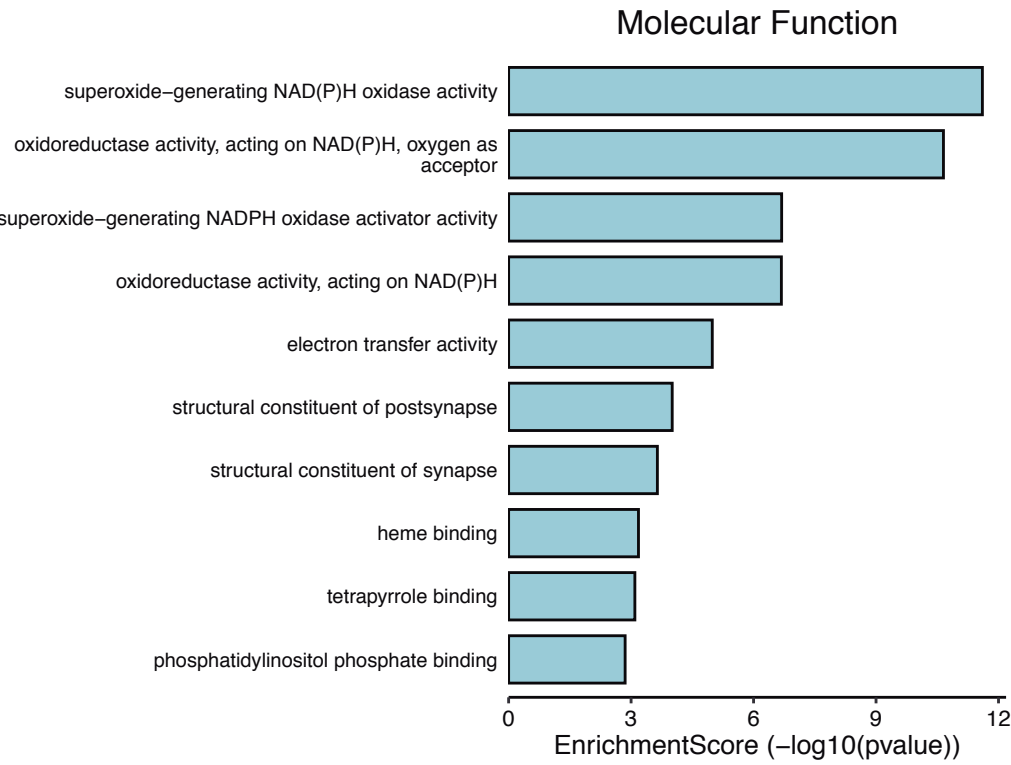

B

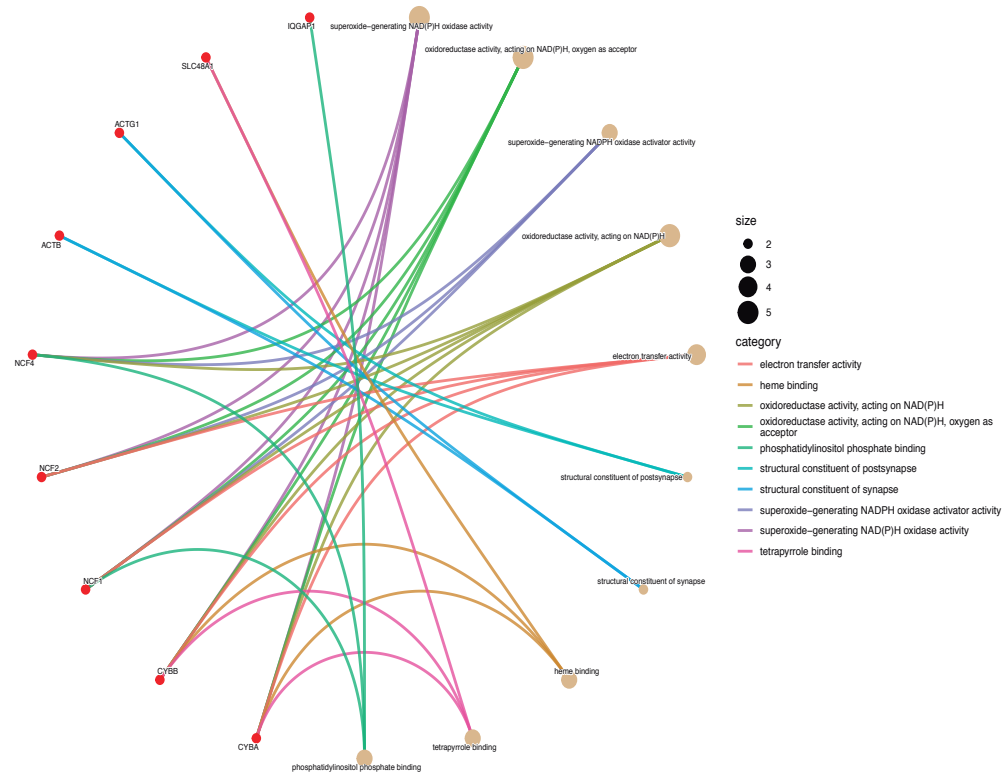

C

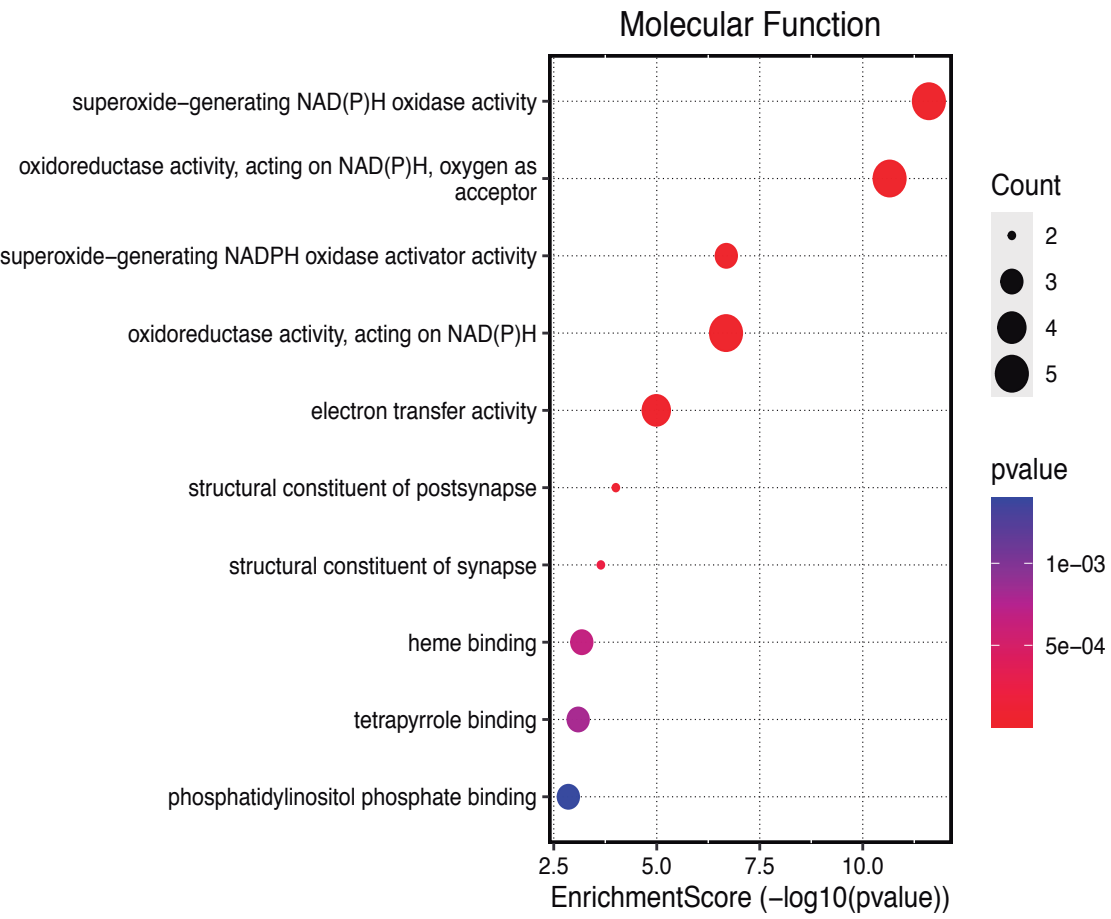

D

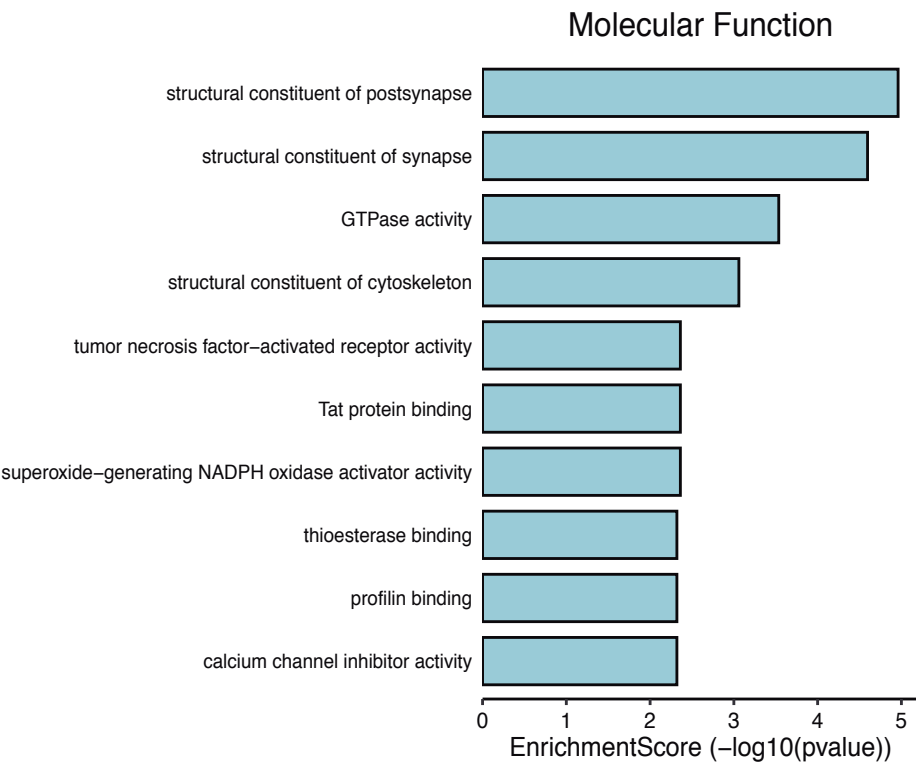

E

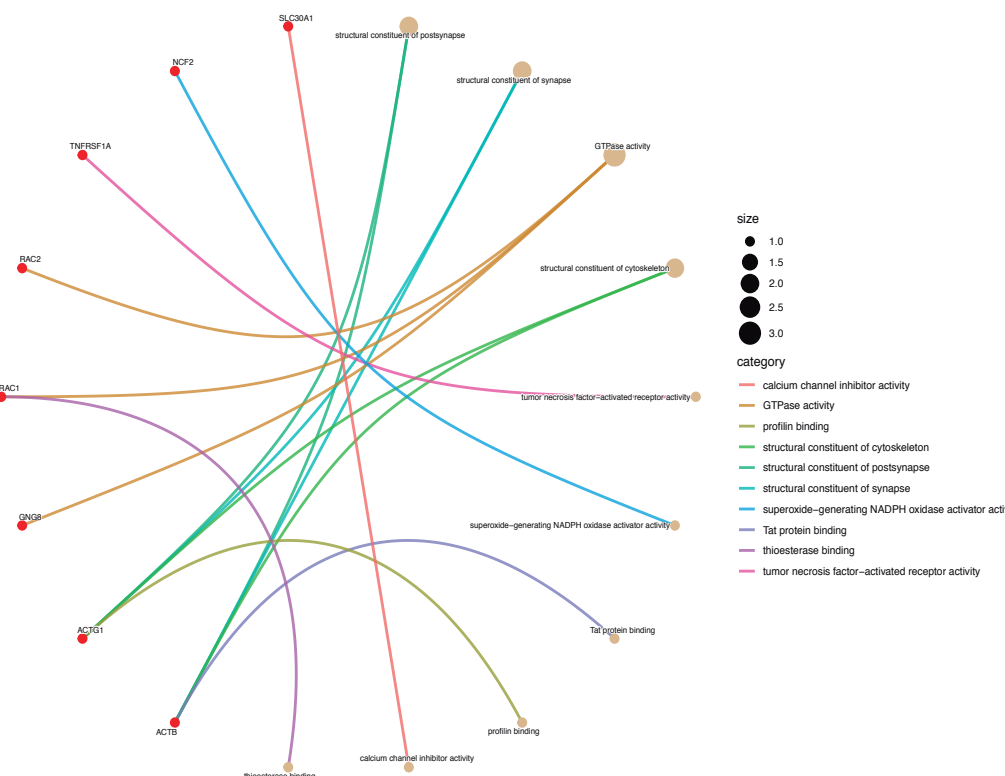

F

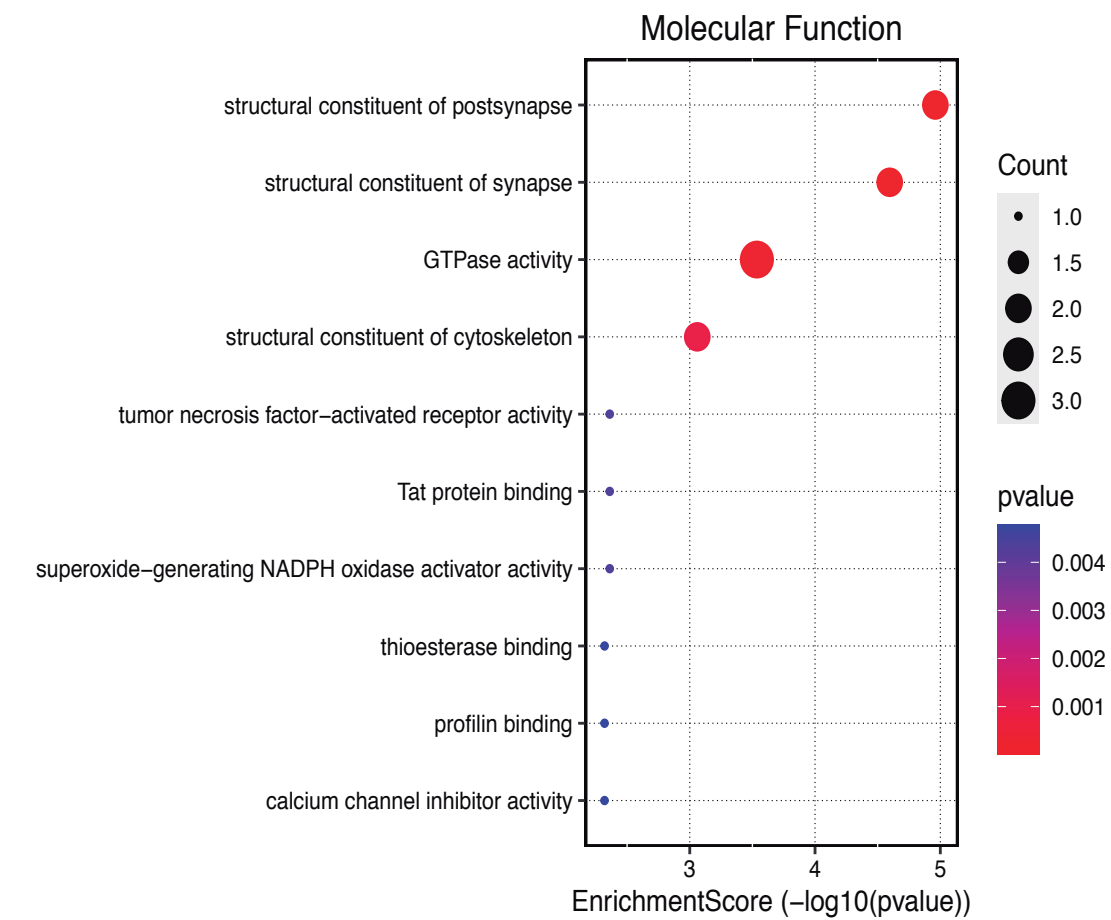

Supplement: s1 [file s1]

A

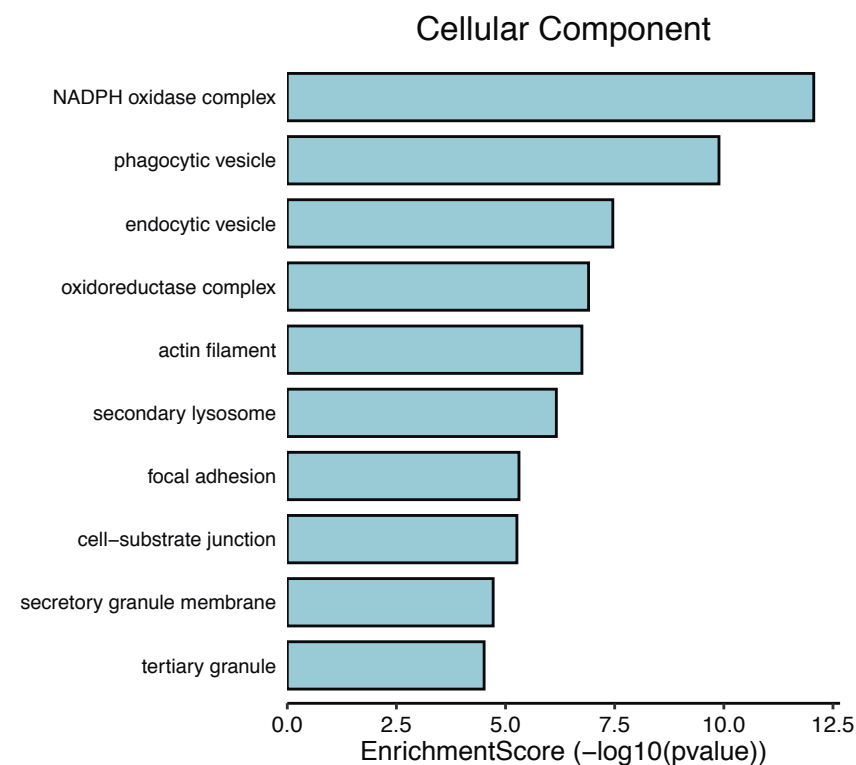

B

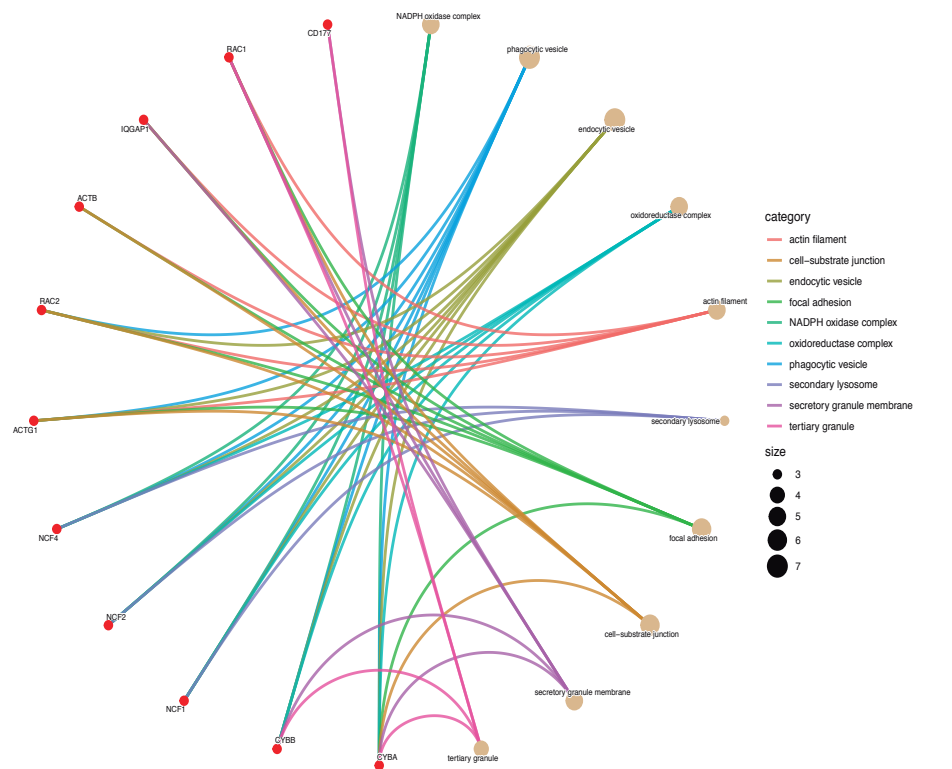

C

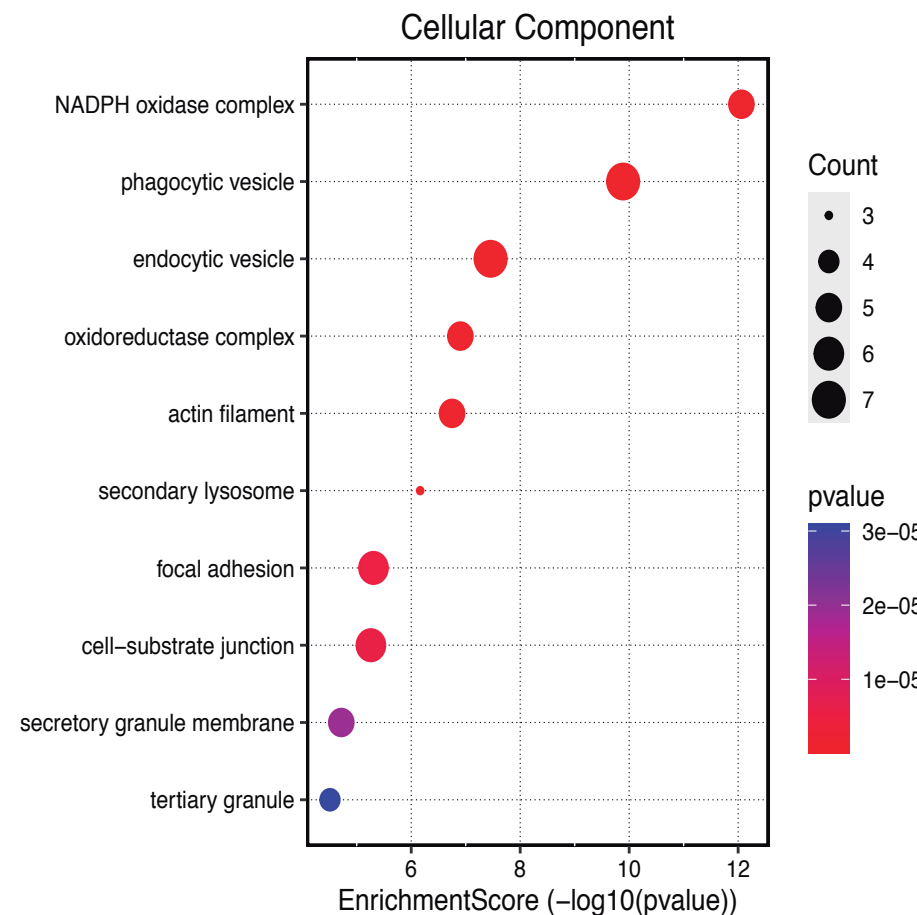

D

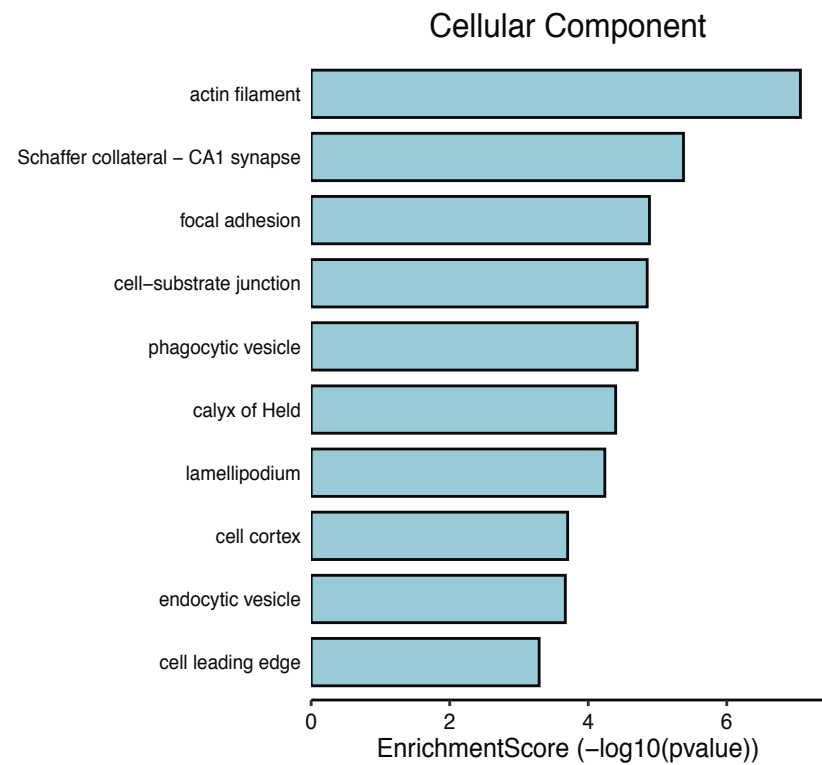

E

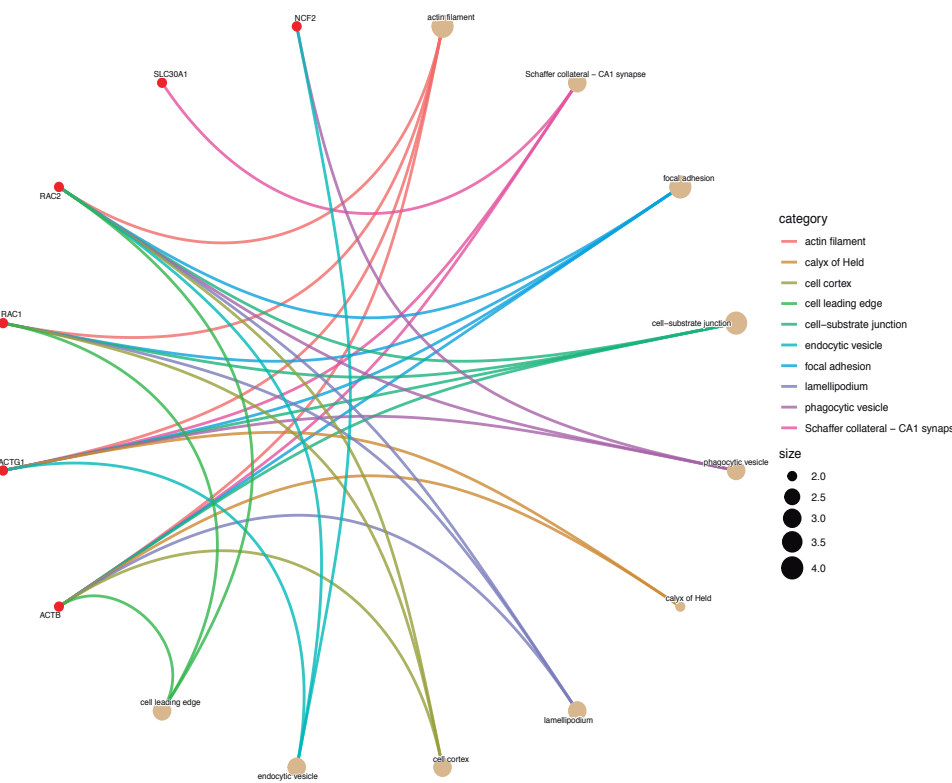

F

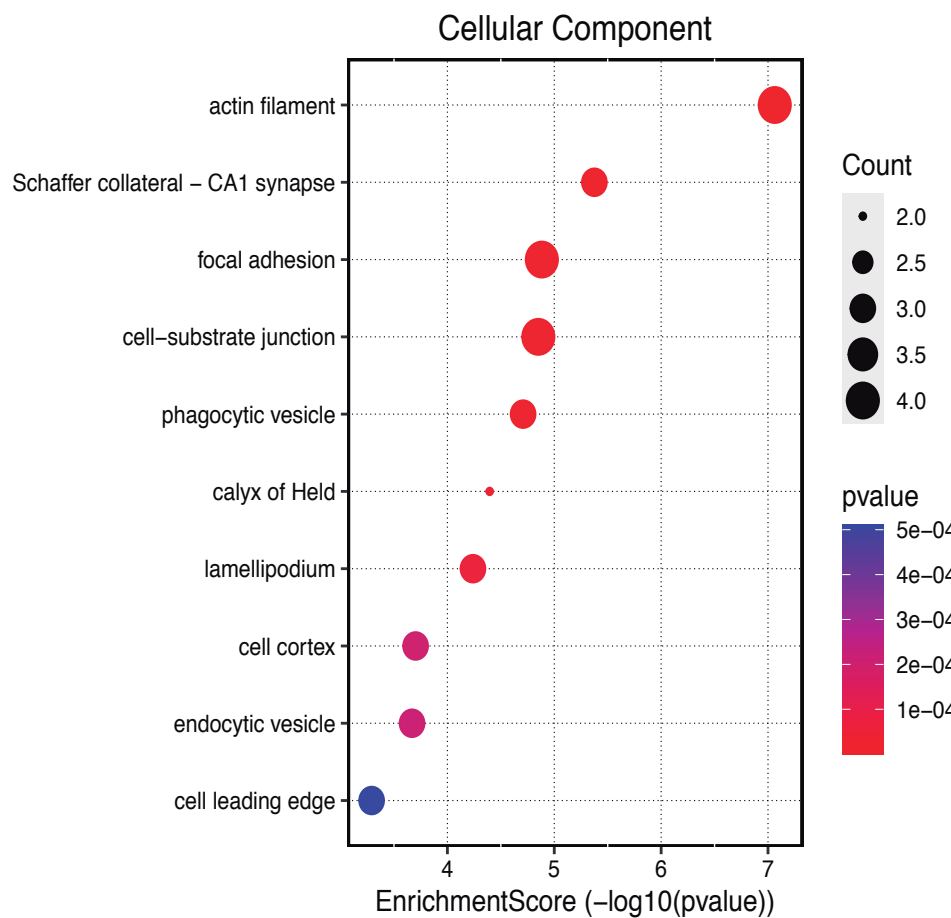

Supplement: s1 [file s1]

A

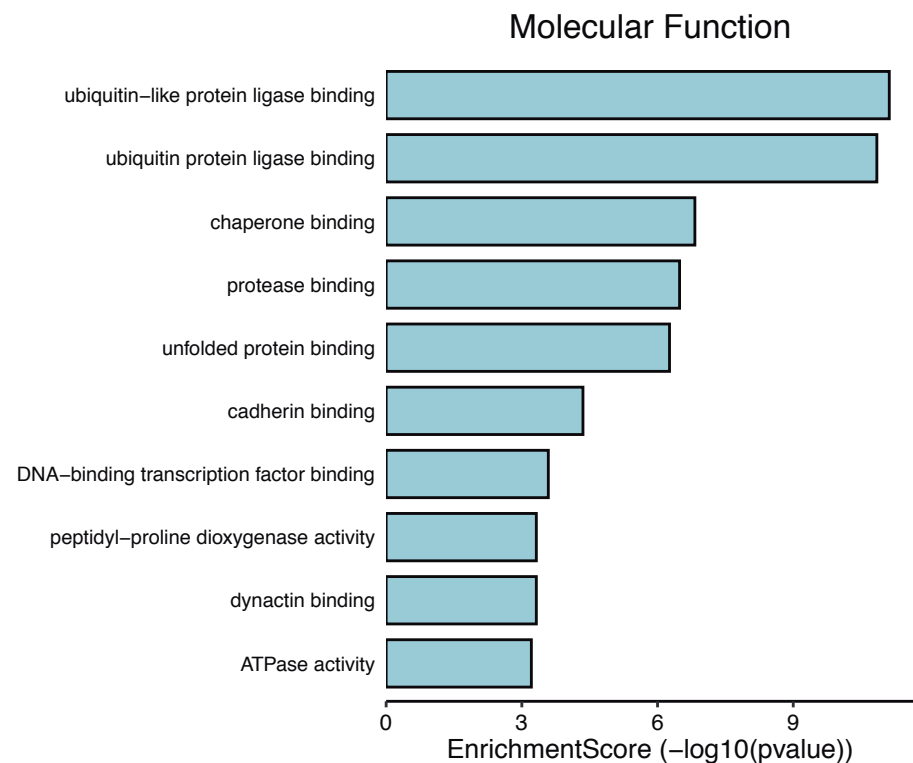

B

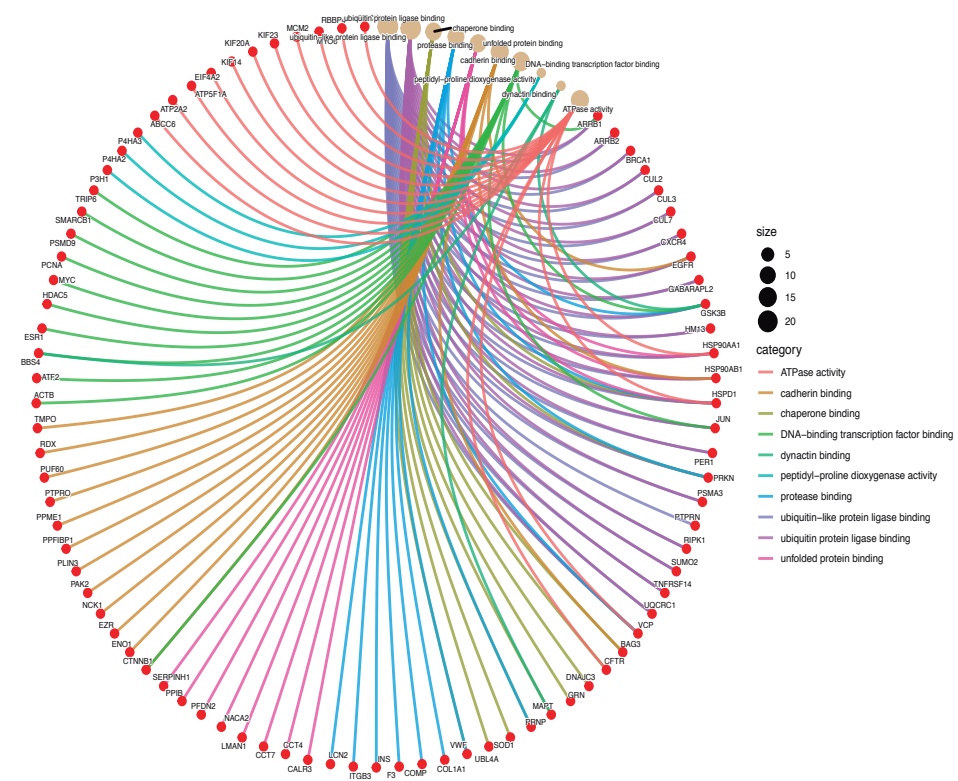

C

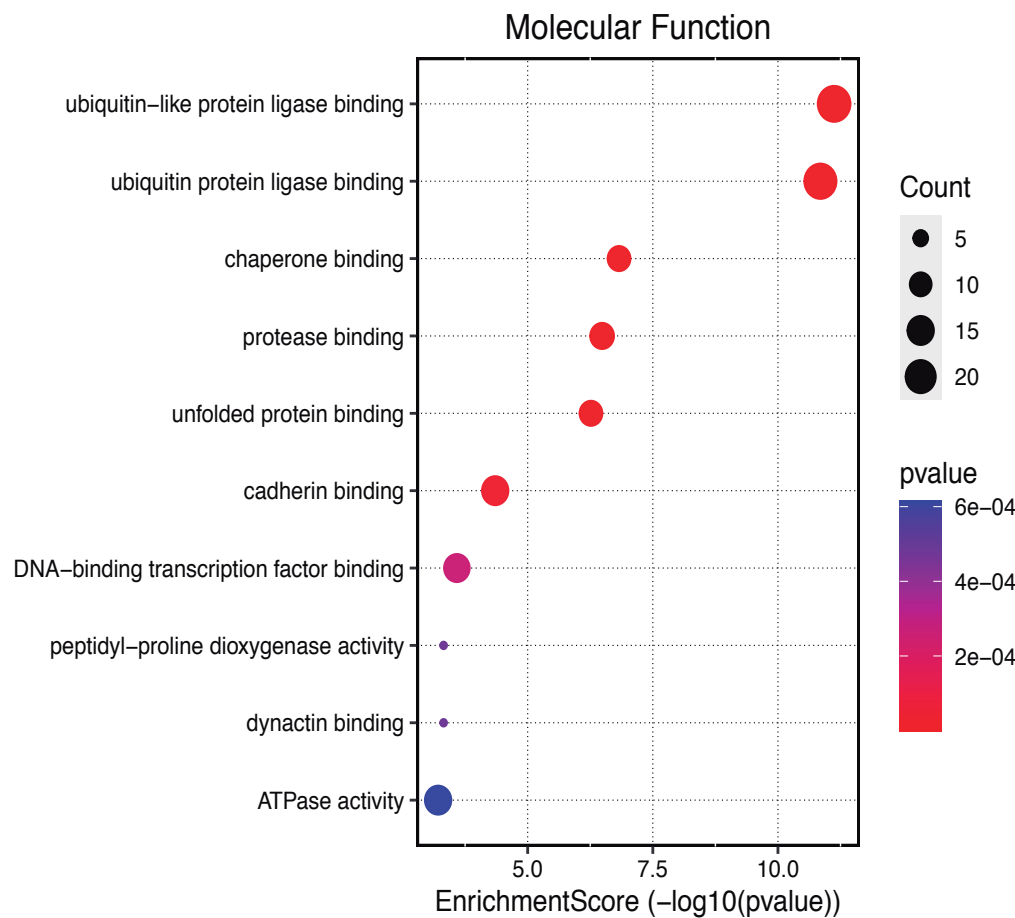

D

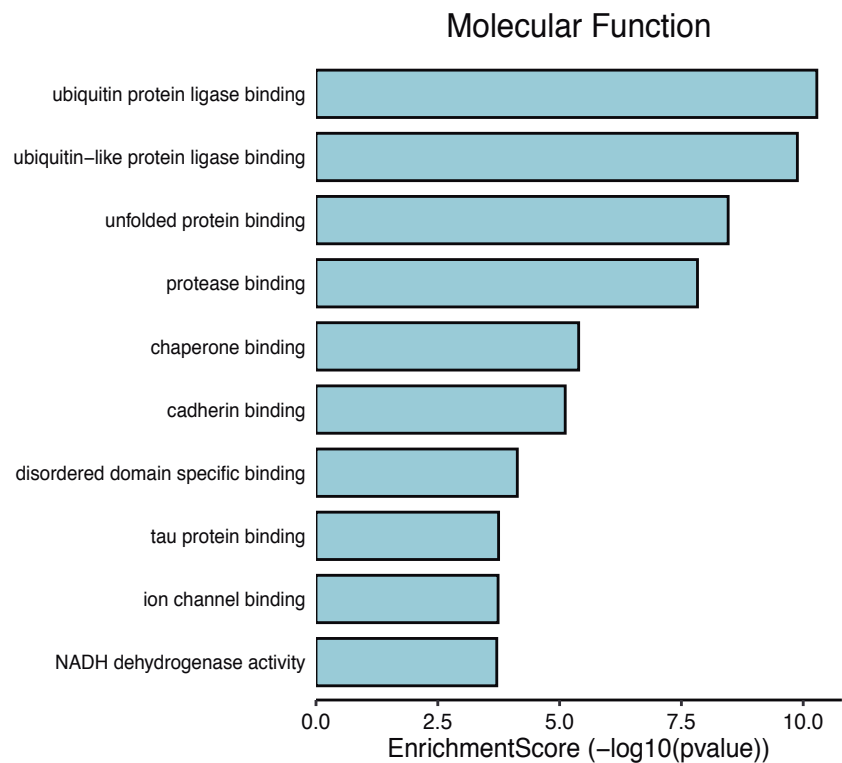

E

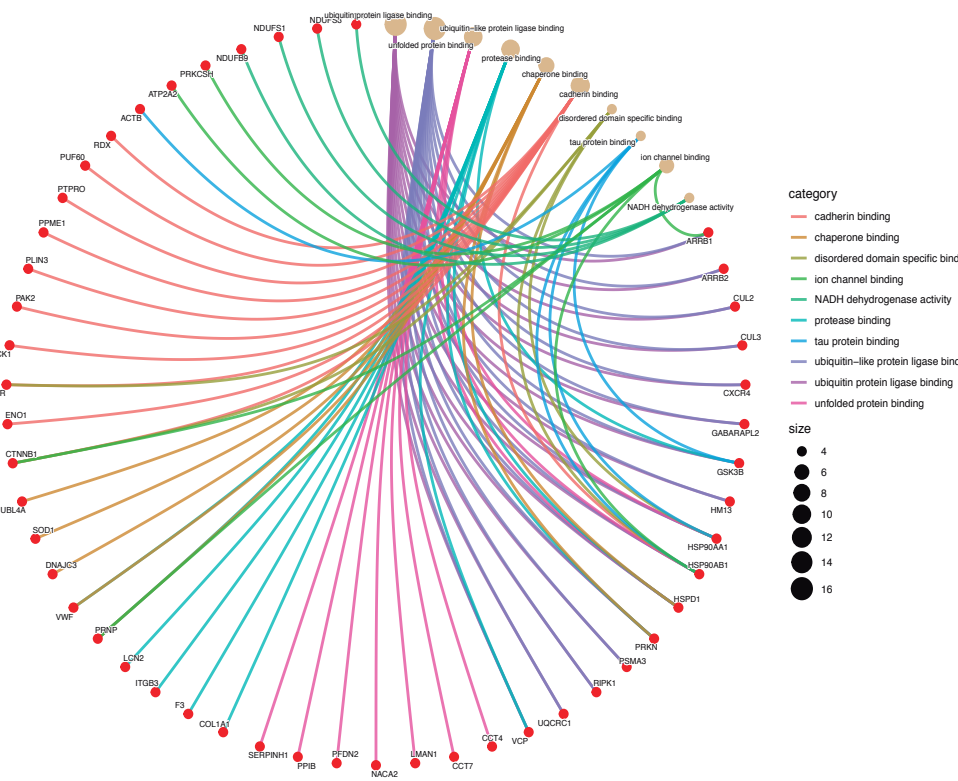

F

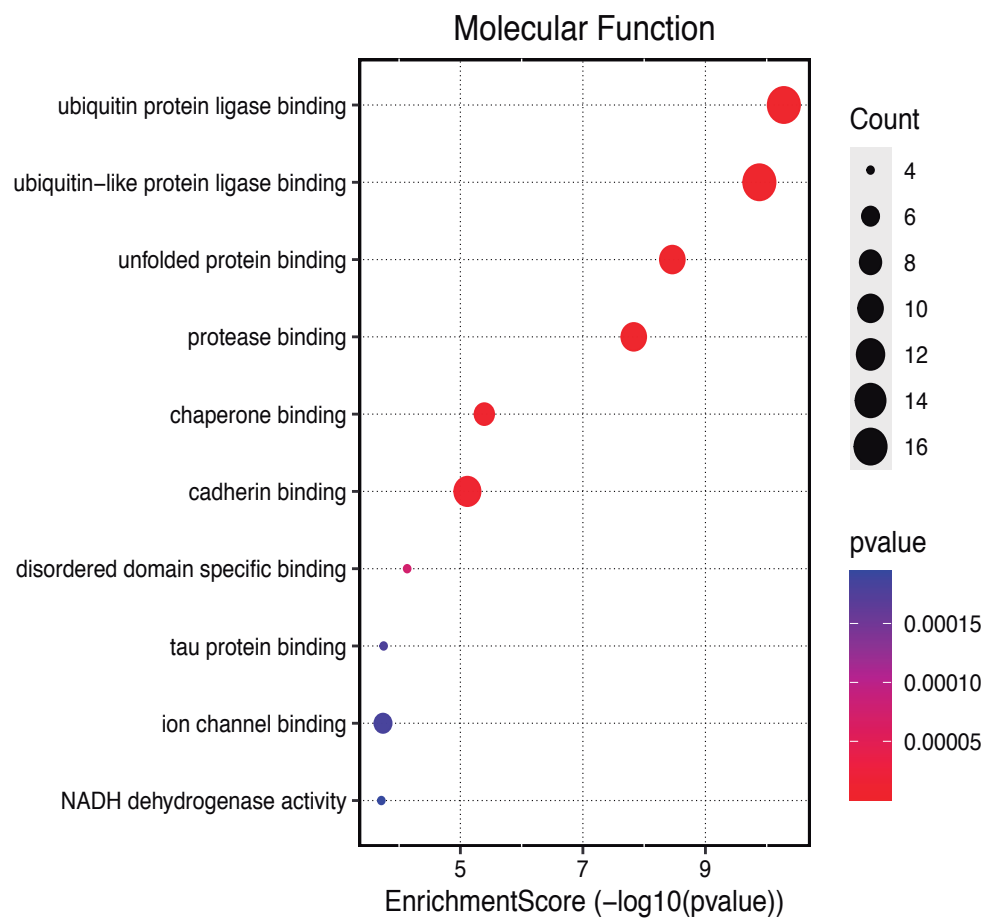

Supplement: s1 [file s1]

A

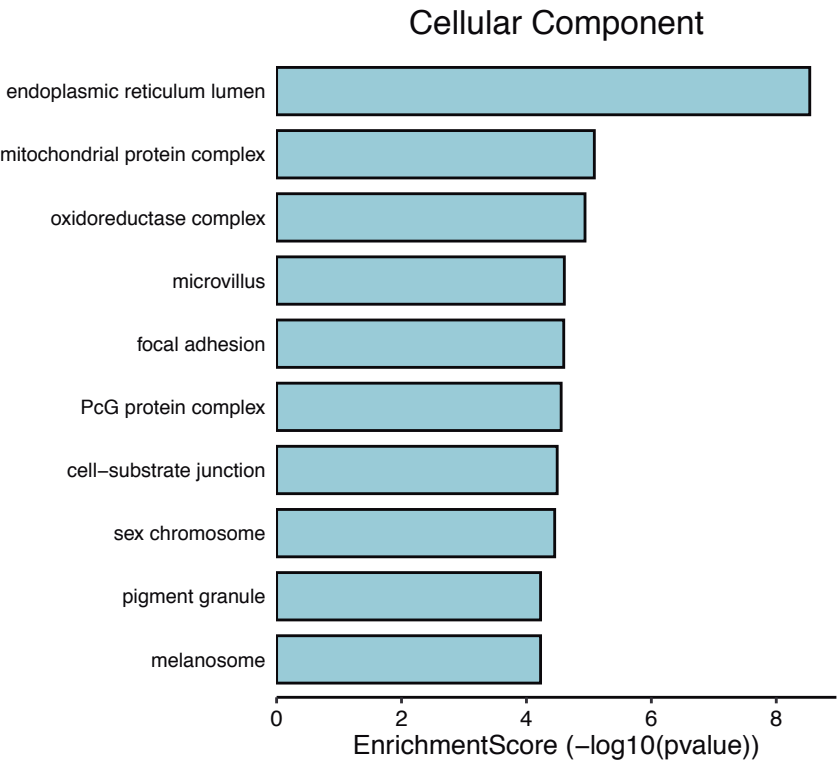

B

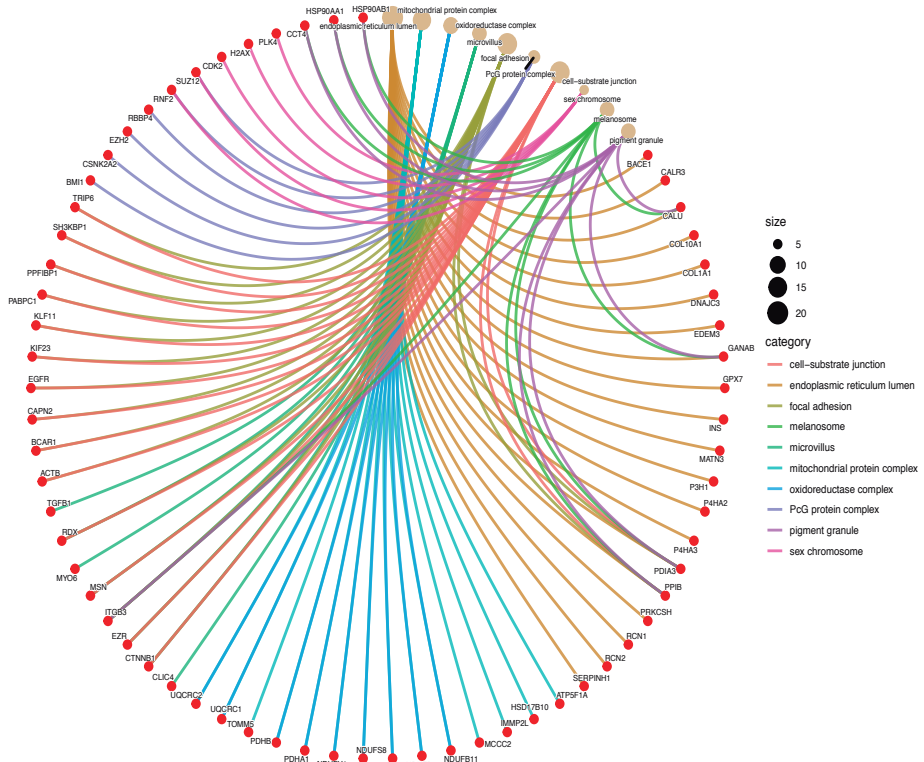

C

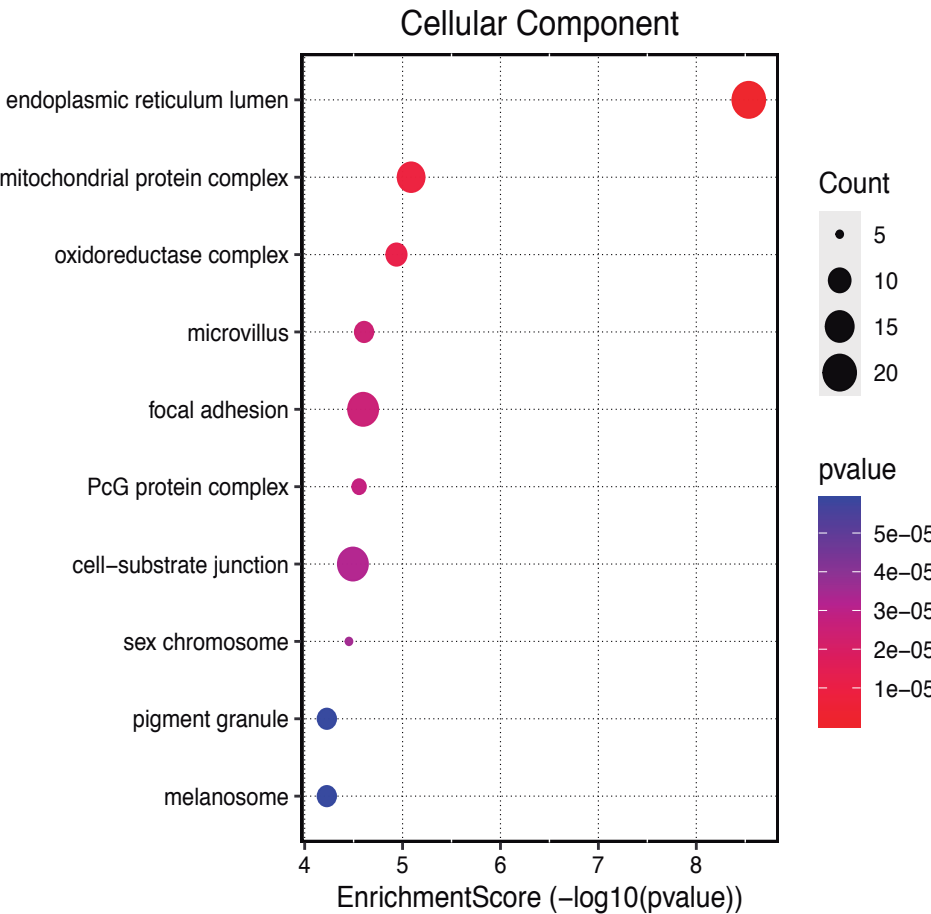

D

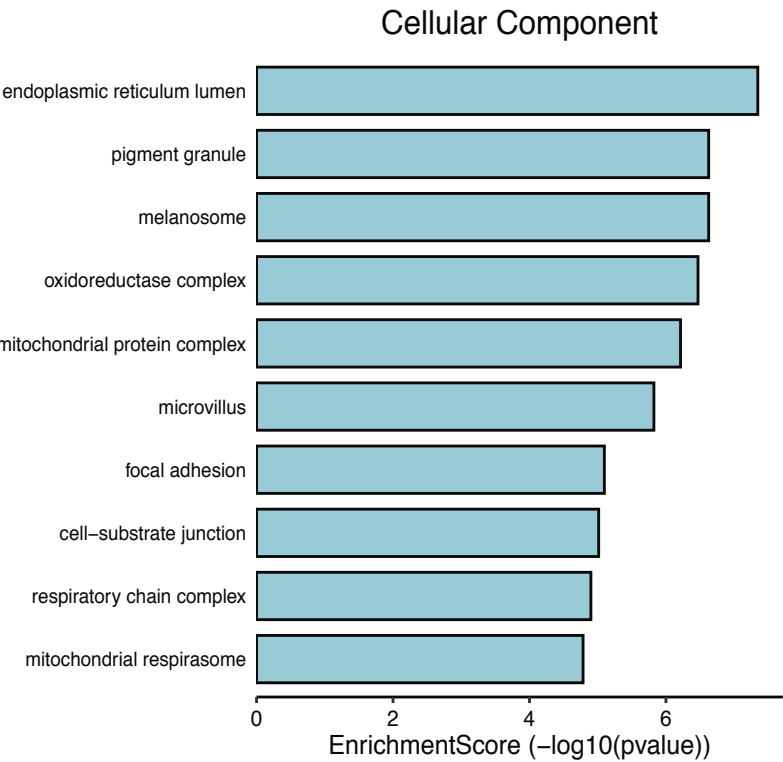

E

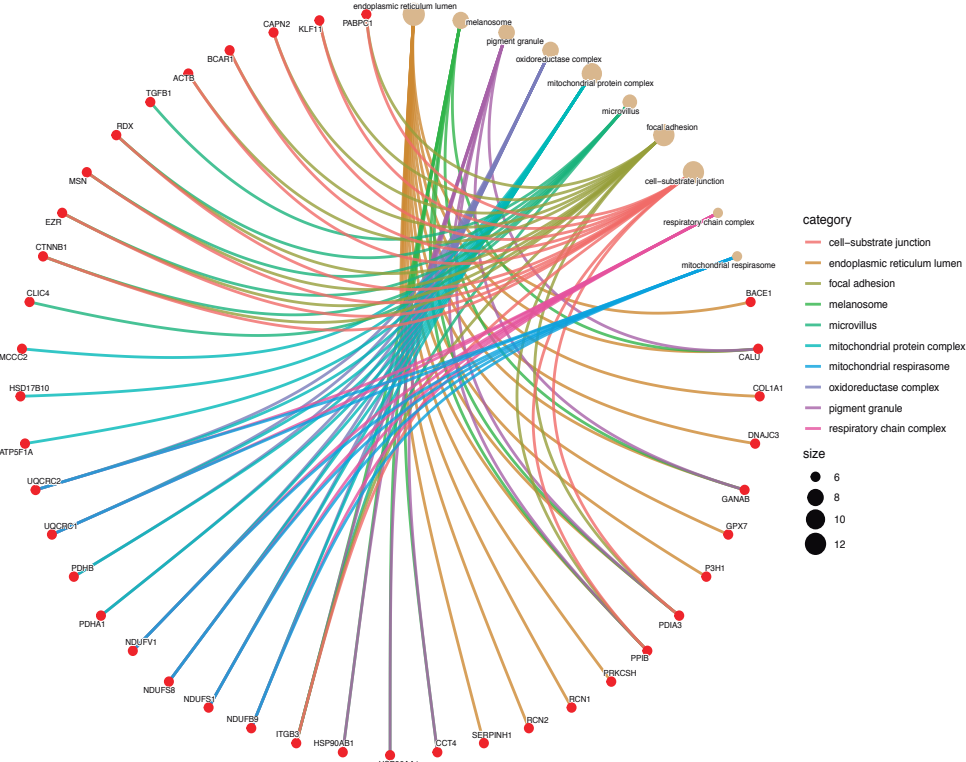

F

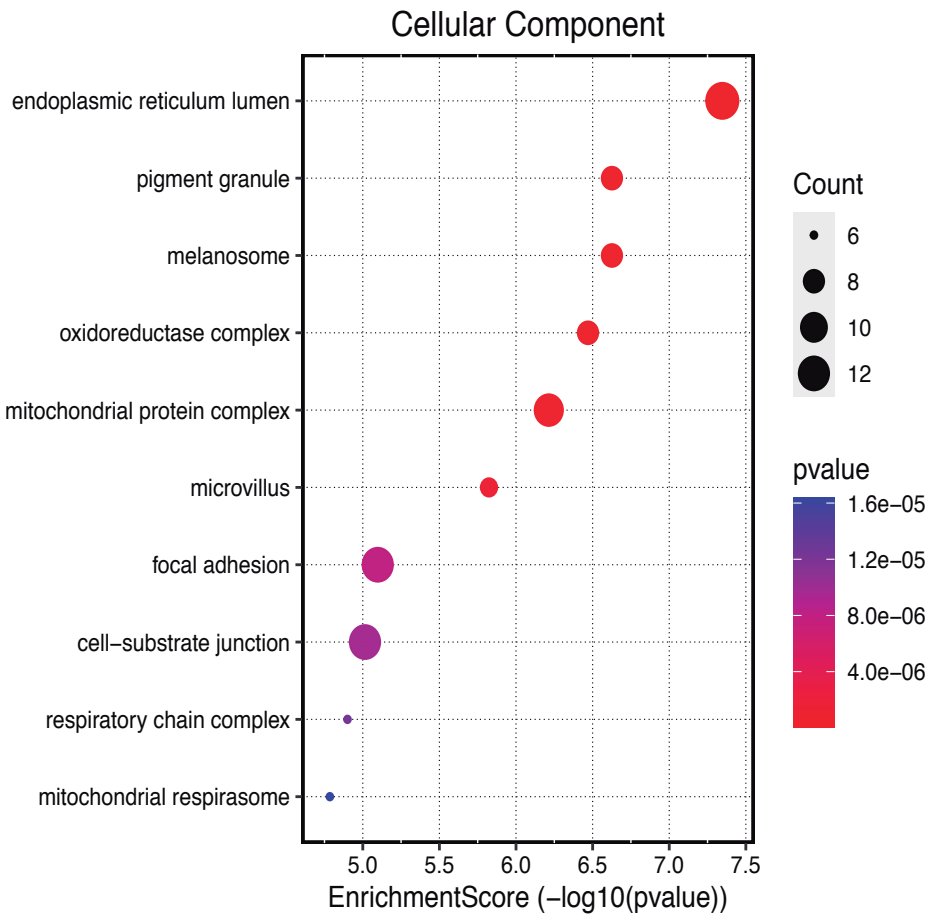

Supplement: s1 [file s1]

NOX1

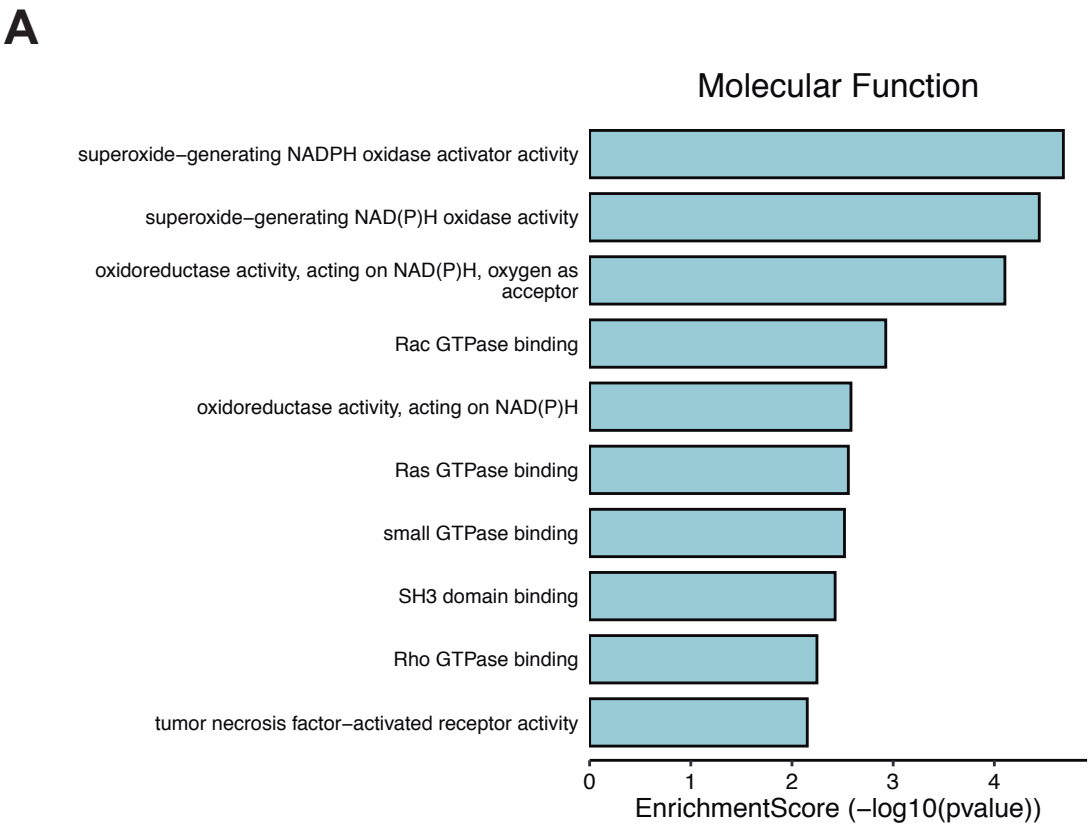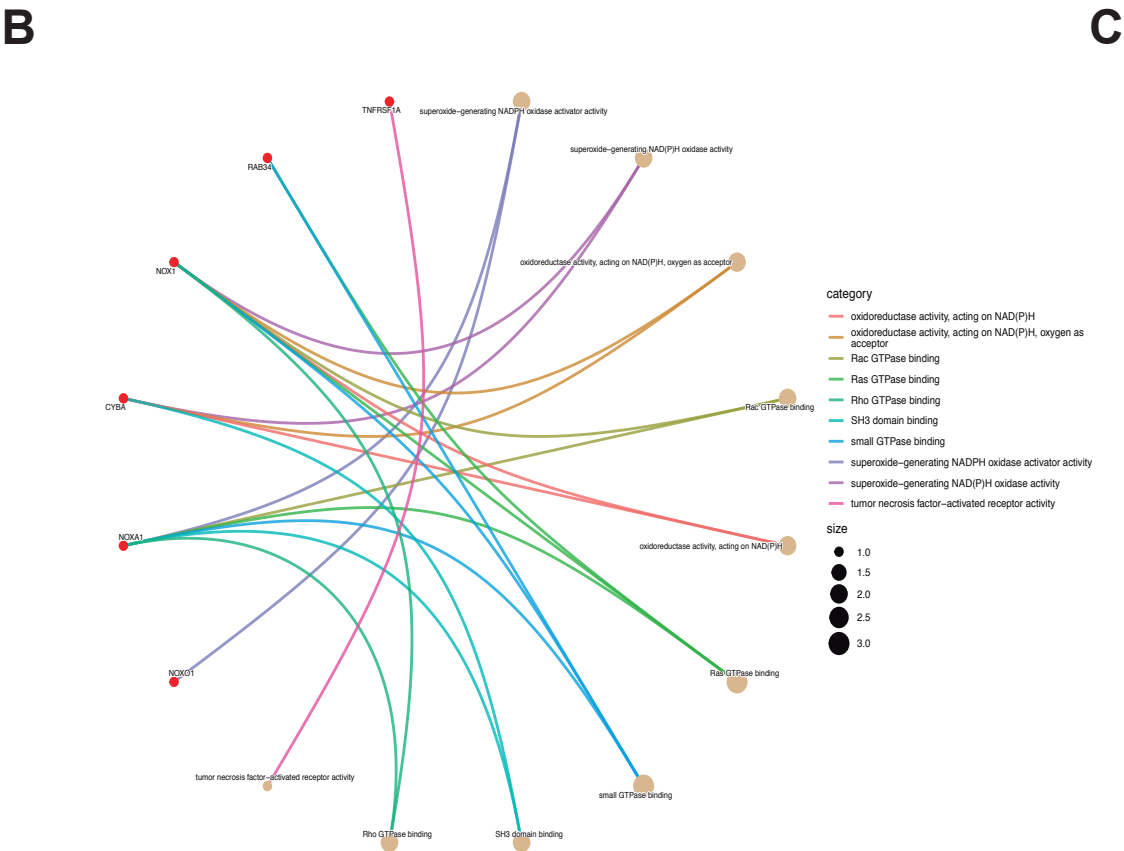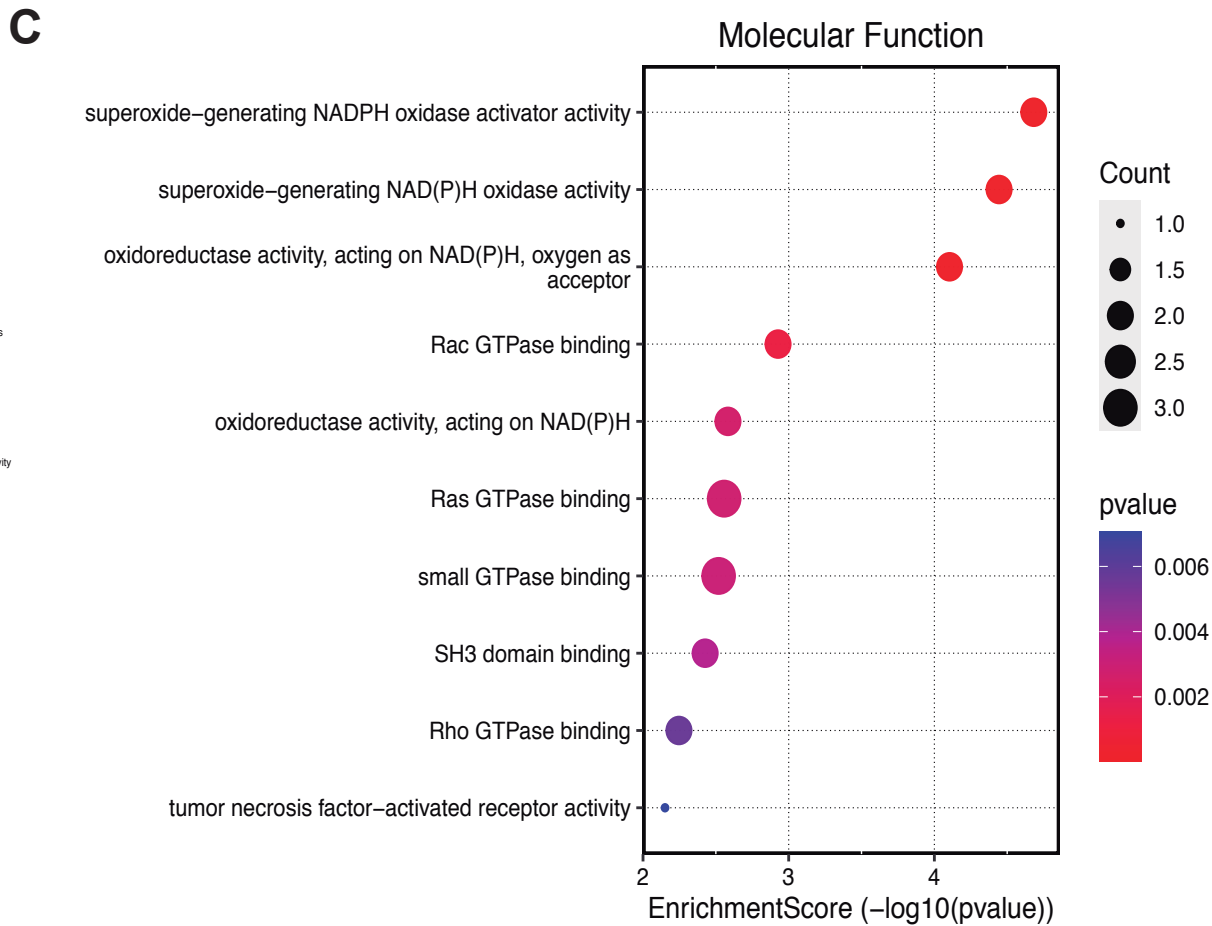

NOX1-Platelets

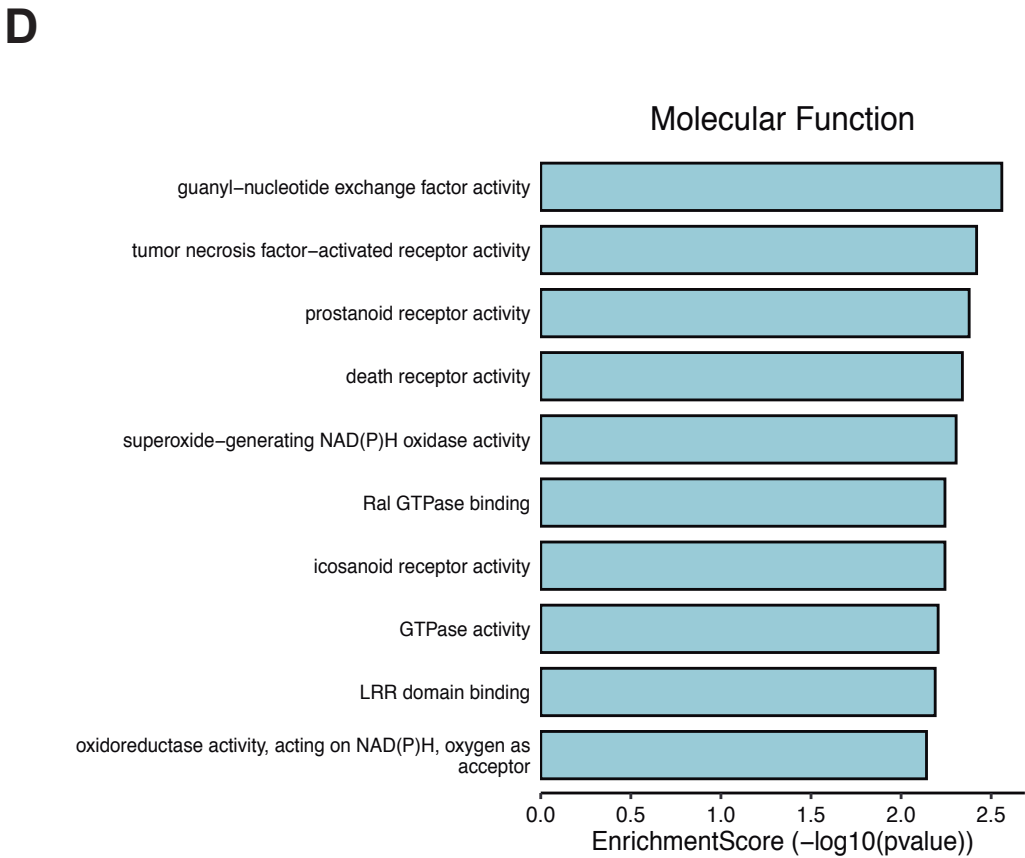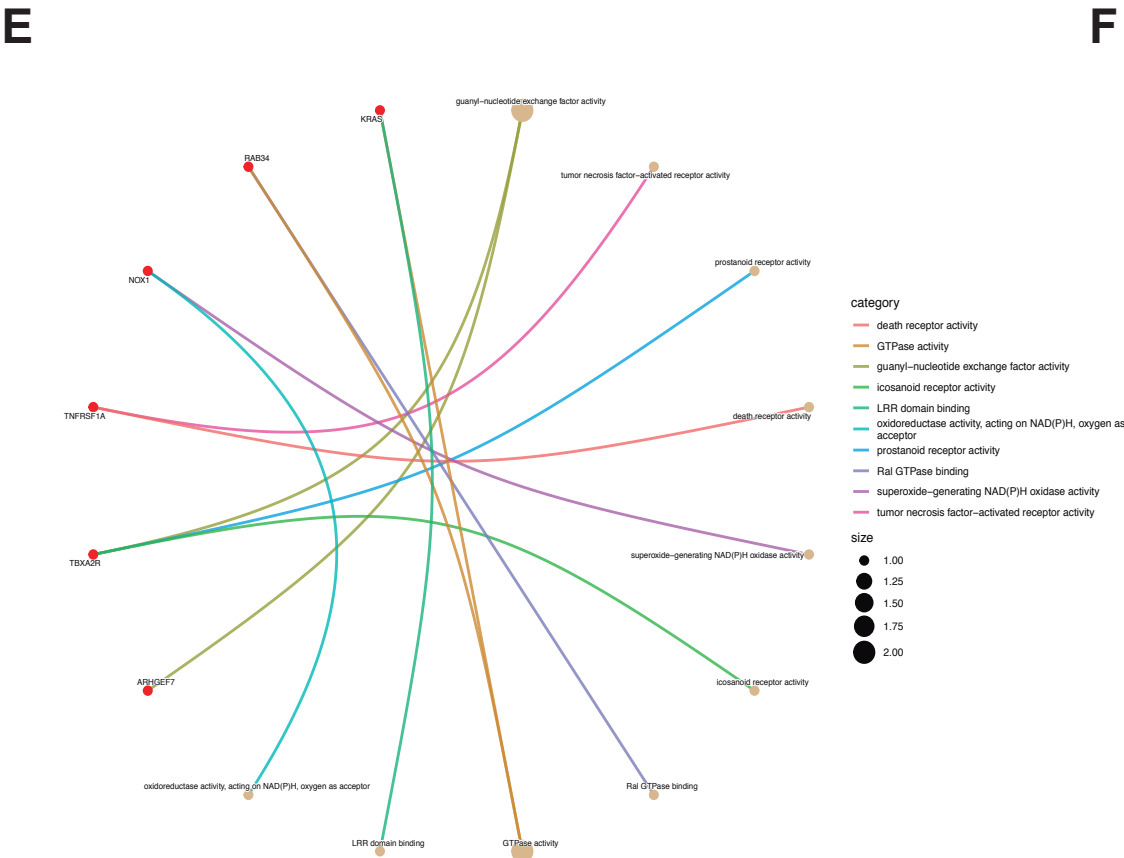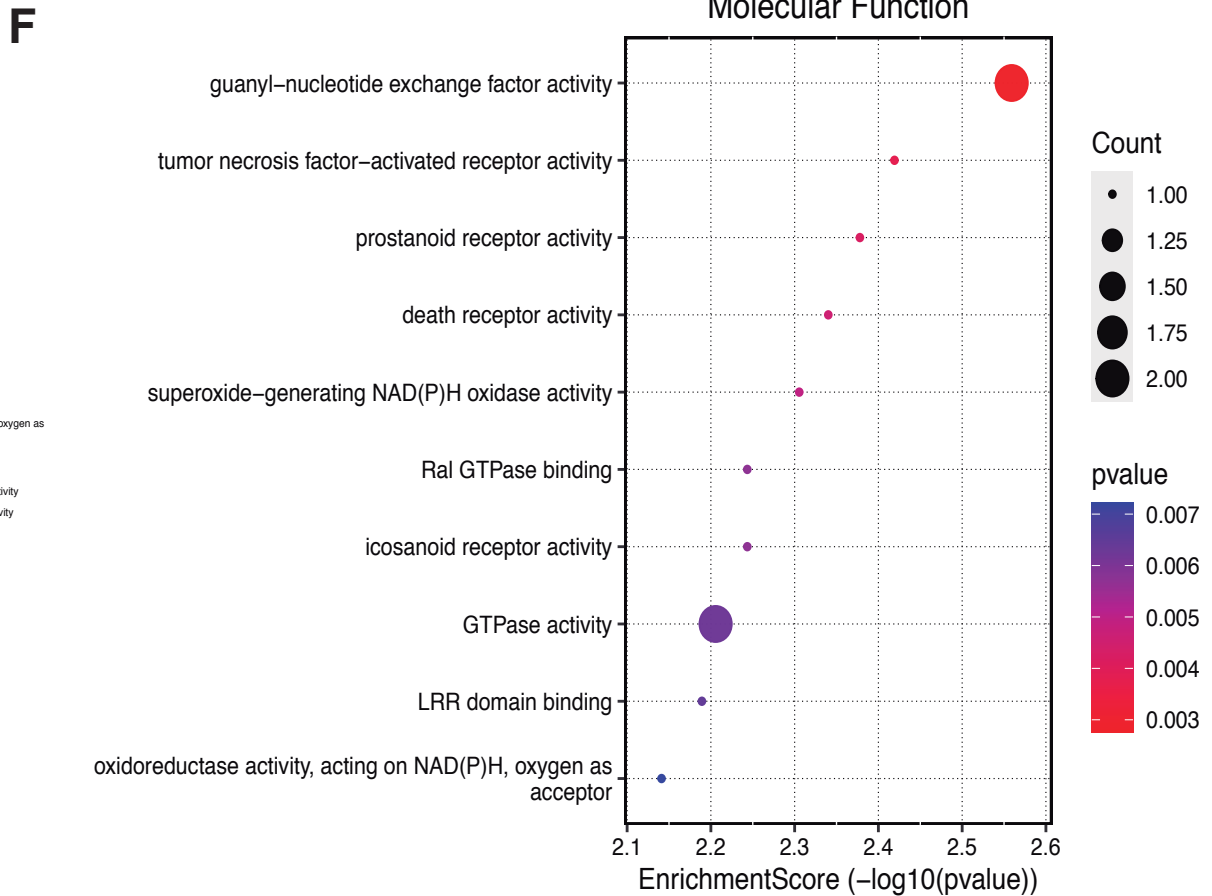

Supplement: s1 [file s1]

PDIA3

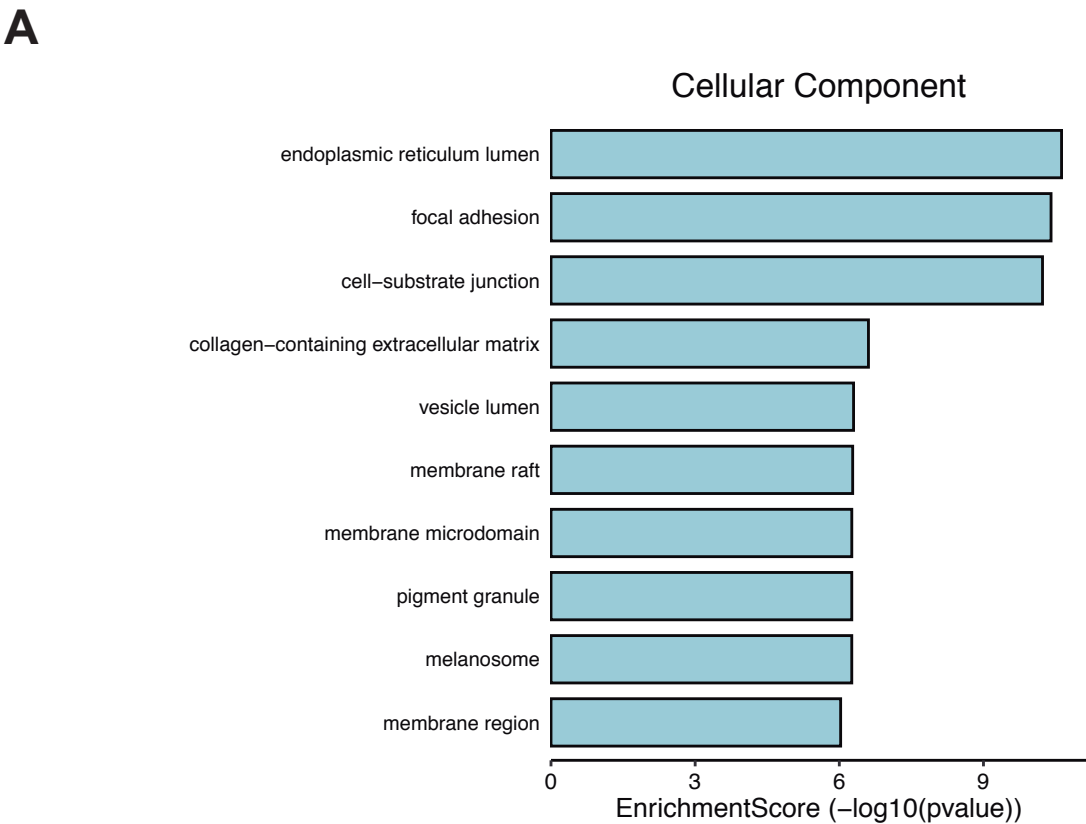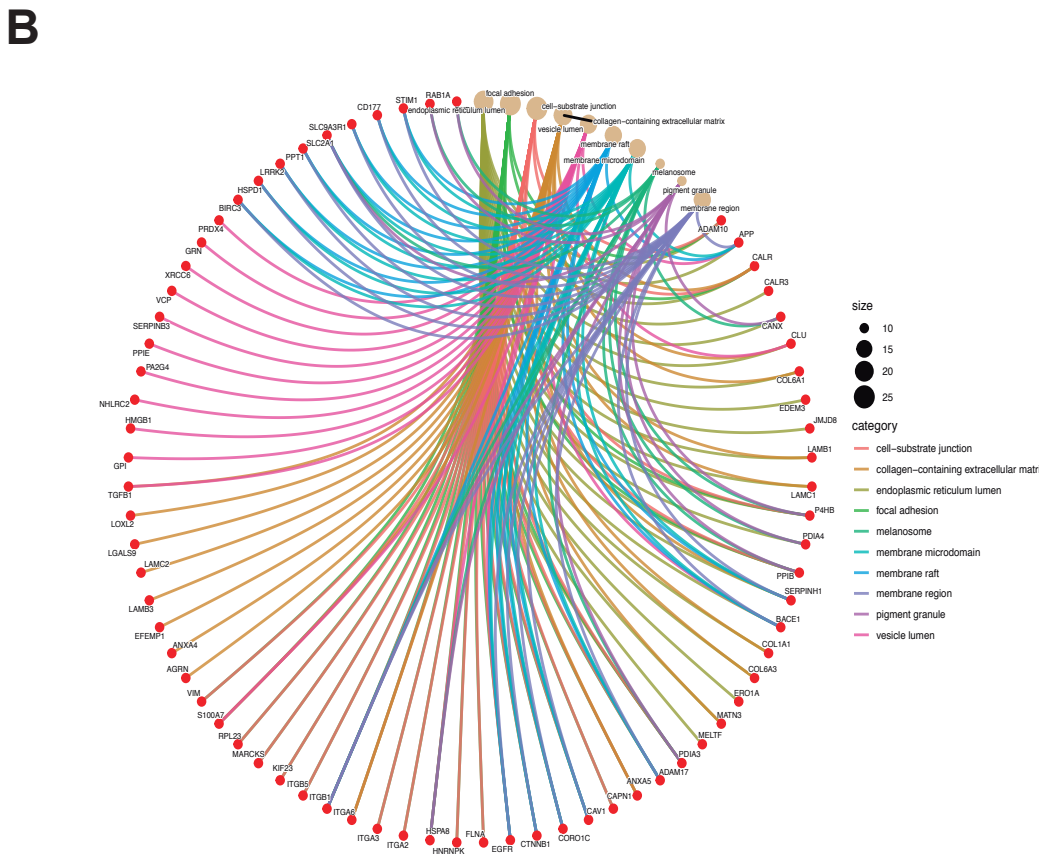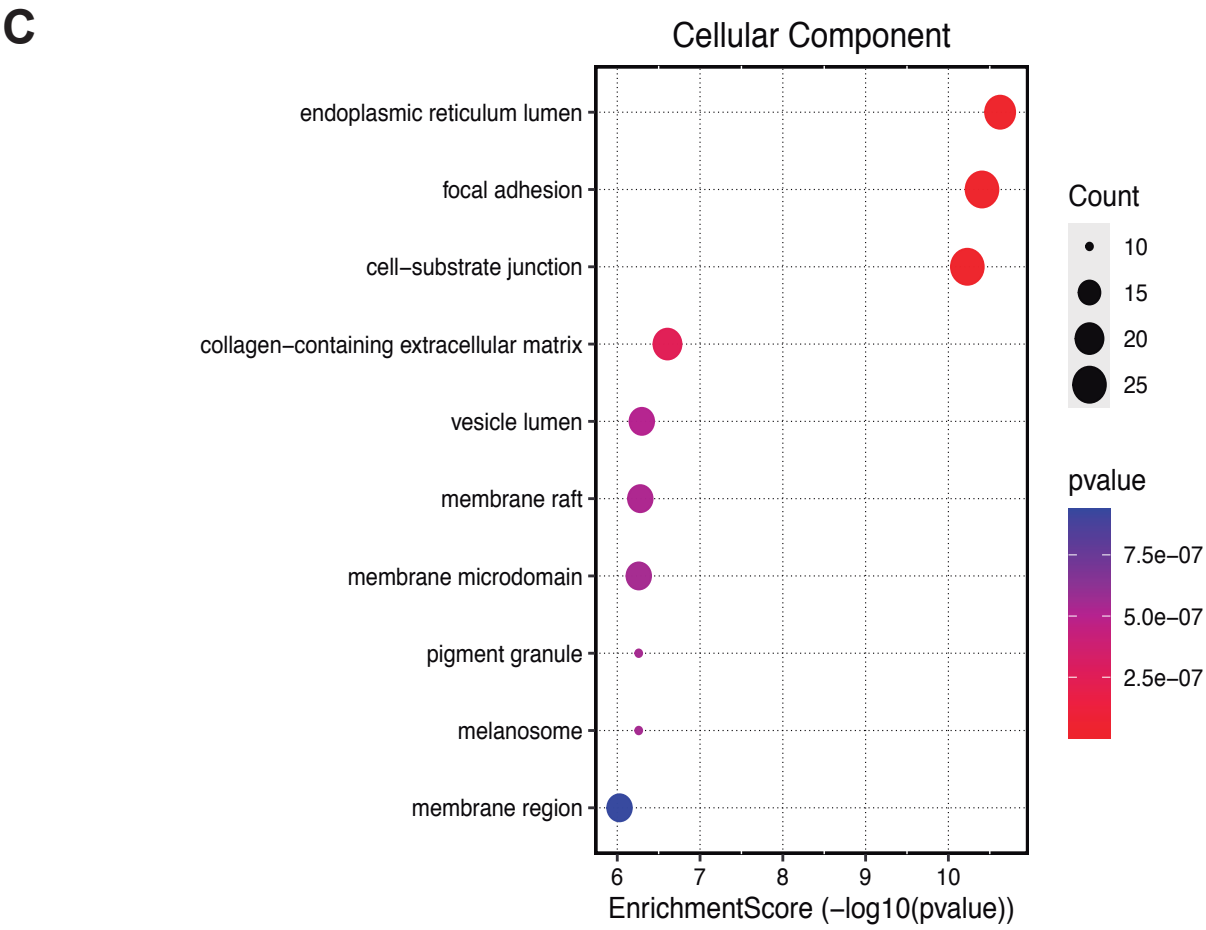

PDIA3-Platelets

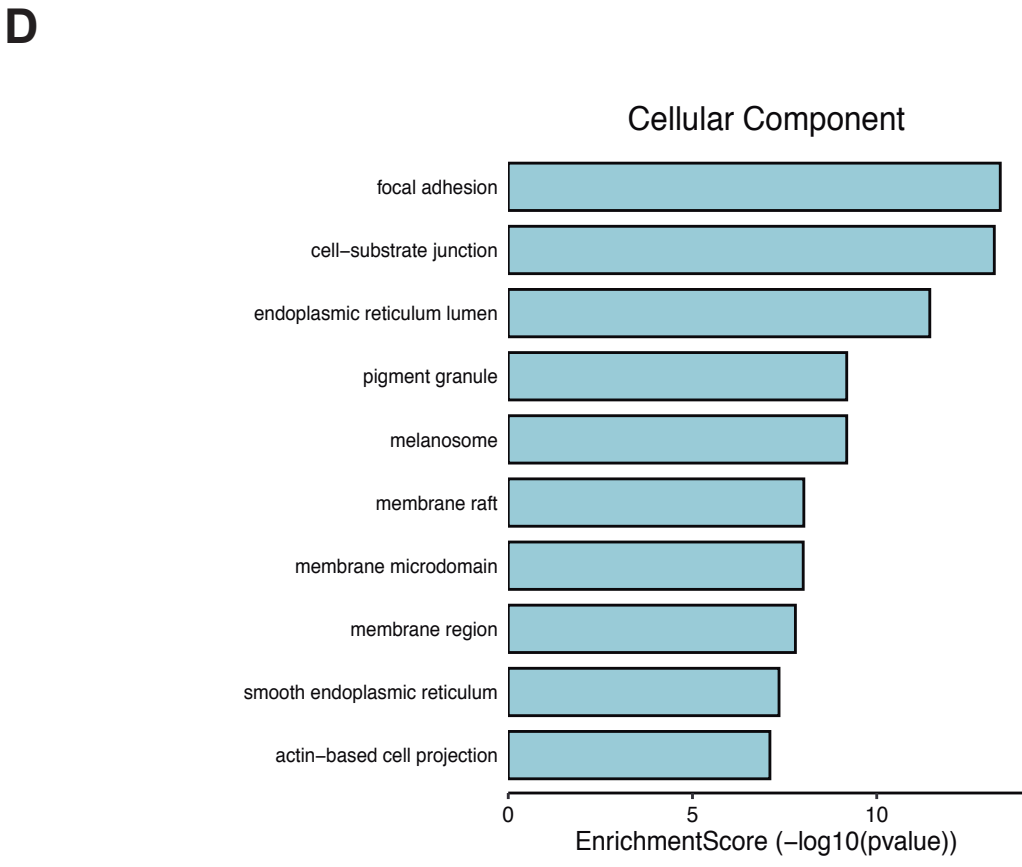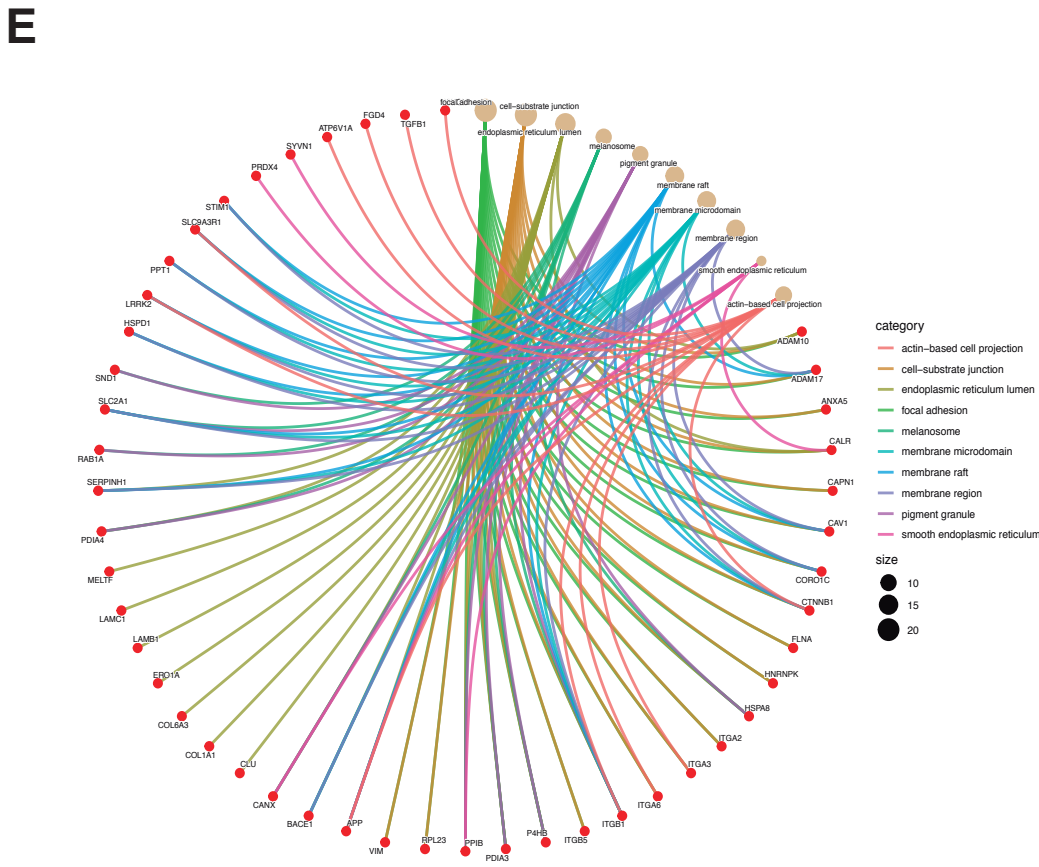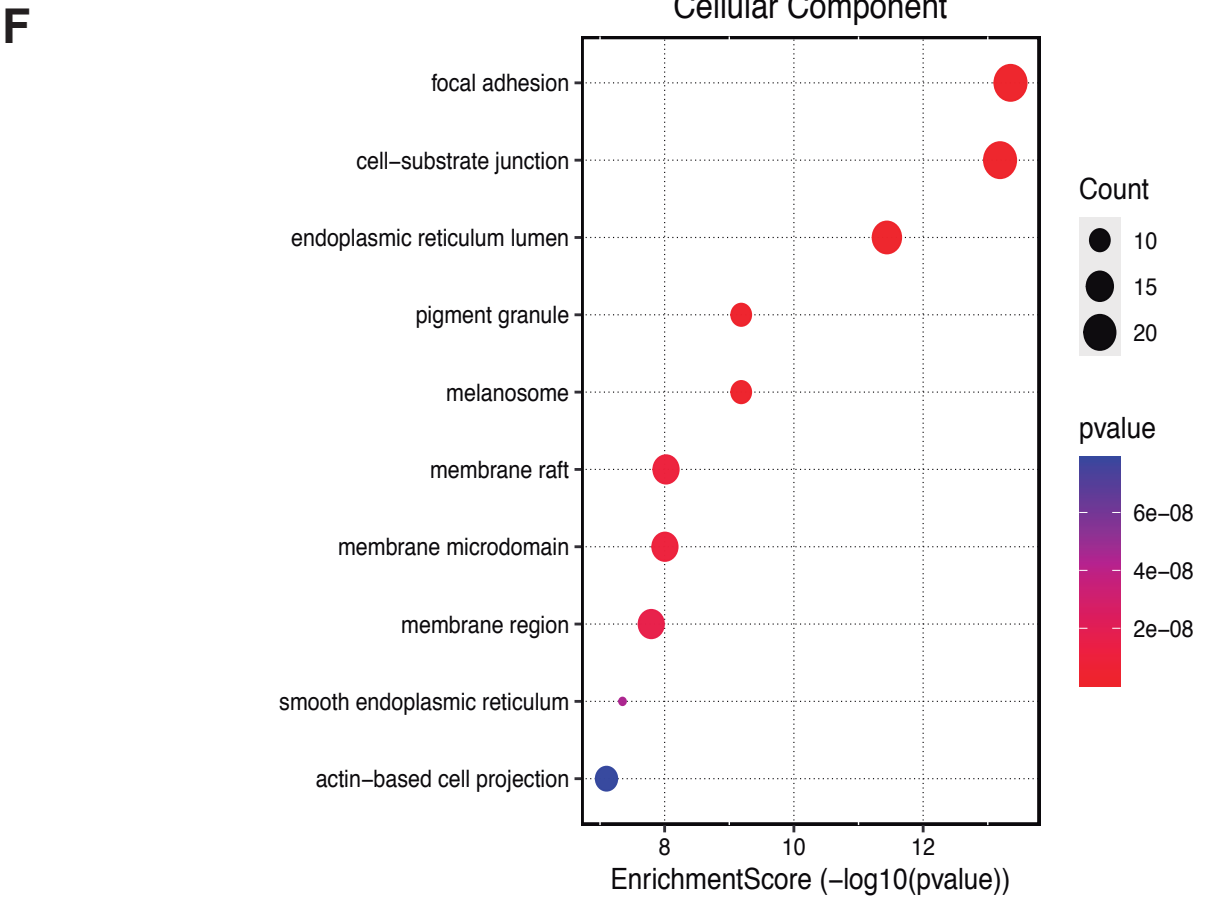

Supplement: s1 [file s1]
